# Supplementary material
Source: PubMed Central journal article supplement (PMC1174979)
Supplement: pnas_0500756102_2.pdf [file pnas_0500756102_2.pdf]

Table 1. HGU95Av2 GeneChip probesets (374) representing 261 transcripts of the core CR2-TAG NE cell signature

| Probeset ID | GenBank ID | Gene Name                                                                | Gene Symbol | LocusLink ID |
|-------------|------------|--------------------------------------------------------------------------|-------------|--------------|
| 40542_at    | AI793265   | achaete-scute complex-like 1 (Drosophila)                                | ASCL1       | 429          |
| 40543_at    | L08424     | achaete-scute complex-like 1 (Drosophila)                                | ASCL1       | 429          |
| 40544_g_at  | L08424     | achaete-scute complex-like 1 (Drosophila)                                | ASCL1       | 429          |
| 37034_at    | U73477     | acidic (leucine-rich) nuclear phosphoprotein 32 family, member A         | ANP32A      | 8125         |
| 40347_at    | AA913812   | acidic (leucine-rich) nuclear phosphoprotein 32 family, member E         | ANP32E      | 81611        |
| 40348_s_at  | W25866     | acidic (leucine-rich) nuclear phosphoprotein 32 family, member E         | ANP32E      | 81611        |
| 39058_at    | U01147     | active BCR-related gene                                                  | ABR         | 29           |
| 35134_at    | U47054     | ADP-ribosyltransferase 3                                                 | ART3        | 419          |
| 35835_at    | AB019409   | anaphase promoting complex subunit 5                                     | ANAPC5      | 51433        |
| 418_at      | X65550     | antigen identified by monoclonal antibody Ki-67                          | MKI67       | 4288         |
| 419_at      | X65550     | antigen identified by monoclonal antibody Ki-67                          | MKI67       | 4288         |
| 36057_at    | AB011084   | armadillo repeat containing, X-linked 2                                  | ARMCX2      | 9823         |
| 39831_at    | AI972631   | arsenate resistance protein ARS2                                         | ARS2        | 51593        |
| 39832_at    | AL096723   | arsenate resistance protein ARS2                                         | ARS2        | 51593        |
| 39806_at    | AL050261   | ASF1 anti-silencing function 1 homolog A (S. cerevisiae)                 | ASF1A       | 25842        |
| 39807_at    | A1344307   | ASF1 anti-silencing function 1 homolog A (S. cerevisiae)                 | ASF1A       | 25842        |
| 40532_at    | U75285     | baculoviral IAP repeat-containing 5 (survivin)                           | BIRC5       | 332          |
| 40533_at    | AI417038   | baculoviral IAP repeat-containing 5 (survivin)                           | BIRC5       | 332          |
| 38663_at    | AI033692   | barrier to autointegration factor 1                                      | BANF1       | 8815         |
| 39436_at    | AF079221   | BCL2/adenovirus E1B 19kDa interacting protein 3-like                     | BNIP3L      | 665          |
| 36352_at    | AI275093   | brain acyl-CoA hydrolase                                                 | BACH        | 11332        |
| 37945_at    | U91316     | brain acyl-CoA hydrolase                                                 | BACH        | 11332        |
| 1088_at     | M61176     | brain-derived neurotrophic factor                                        | BDNF        | 627          |
| 40023_at    | X60201     | brain-derived neurotrophic factor                                        | BDNF        | 627          |
| 1993_s_at   | U14680     | breast cancer 1, early onset                                             | BRCA1       | 672          |
| 33724_at    | U64805     | breast cancer 1, early onset                                             | BRCA1       | 672          |
| 604_at      | L78833     | breast cancer 1, early onset                                             | BRCA1       | 672          |
| 1503_at     | X95152     | breast cancer 2, early onset                                             | BRCA2       | 675          |
| 1989_at     | U43746     | breast cancer 2, early onset                                             | BRCA2       | 675          |
| 1990_g_at   | U43746     | breast cancer 2, early onset                                             | BRCA2       | 675          |
| 36634_at    | U72649     | BTG family, member 2                                                     | BTG2        | 7832         |
| 41081_at    | AF053305   | BUB1 budding uninhibited by benzimidazoles 1 homolog (yeast)             | BUB1        | 699          |
| 34783_s_at  | AF047473   | BUB3 budding uninhibited by benzimidazoles 3 homolog (yeast)             | BUB3        | 9184         |
| 41547_at    | AF047472   | BUB3 budding uninhibited by benzimidazoles 3 homolog (yeast)             | BUB3        | 9184         |
| 31848_at    | U36448     | Ca <sup>2+</sup> -dependent secretion activator                          | CADPS       | 8618         |
| 2053_at     | M34064     | cadherin 2, type 1, N-cadherin (neuronal)                                | CDH2        | 1000         |
| 2054_g_at   | M34064     | cadherin 2, type 1, N-cadherin (neuronal)                                | CDH2        | 1000         |
| 38314_at    | AB002304   | capicua homolog (Drosophila)                                             | CIC         | 23152        |
| 36143_at    | U13737     | caspase 3, apoptosis-related cysteine protease                           | CASP3       | 836          |
| 37889_at    | AA535376   | CD47 antigen (Rh-related antigen, integrin-associated signal transducer) | CD47        | 961          |
| 37890_at    | X69398     | CD47 antigen (Rh-related antigen, integrin-associated signal transducer) | CD47        | 961          |
| 38414_at    | U05340     | CDC20 cell division cycle 20 homolog (S. cerevisiae)                     | CDC20       | 991          |
| 40690_at    | X54942     | CDC28 protein kinase regulatory subunit 2                                | CKS2        | 1164         |
| 1536_at     | U77949     | CDC6 cell division cycle 6 homolog (S. cerevisiae)                       | CDC6        | 990          |
| 36839_at    | U77949     | CDC6 cell division cycle 6 homolog (S. cerevisiae)                       | CDC6        | 990          |
| 1809_at     | AB003698   | CDC7 cell division cycle 7 (S. cerevisiae)                               | CDC7        | 8317         |
| 1584_at     | M34065     | cell division cycle 25C                                                  | CDC25C      | 995          |
| 527_at      | U14518     | centromere protein A, 17kDa                                              | CENPA       | 1058         |
| 38920_at    | AF016582   | CHK1 checkpoint homolog (S. pombe)                                       | CHEK1       | 1111         |
| 34763_at    | AF020043   | chondroitin sulfate proteoglycan 6 (bamacan)                             | CSPG6       | 9126         |
| 36912_at    | U20980     | chromatin assembly factor 1, subunit B (p60)                             | CHAF1B      | 8208         |
| 40731_at    | L07515     | chromobox homolog 5 (HP1 alpha homolog, Drosophila)                      | CBX5        | 23468        |
| 40808_at    | U03749     | chromogranin A (parathyroid secretory protein 1)                         | CHGA        | 1113         |
| 33426_at    | Y00064     | chromogranin B (secretogranin 1)                                         | CHGB        | 1114         |
| 1196_at     | D00591     | chromosome condensation 1                                                | CHC1        | 1104         |
| 37927_at    | X12654     | chromosome condensation 1                                                | CHC1        | 1104         |
| 40334_at    | M85085     | cleavage stimulation factor, 3' pre-RNA, subunit 2, 64kDa                | CSTF2       | 1478         |
| 41700_at    | M62424     | coagulation factor II (thrombin) receptor                                | F2R         | 2149         |
| 35385_at    | AI766078   | coenzyme Q7 homolog, ubiquinone (yeast)                                  | COQ7        | 10229        |
| 40272_at    | D78012     | collapsin response mediator protein 1                                    | CRMP1       | 1400         |
| 33084_at    | U35100     | complexin 2                                                              | CPLX2       | 10814        |
| 31887_at    | J04469     | creatine kinase, mitochondrial 1 (ubiquitous)                            | CKMT1       | 1159         |
| 36948_at    | AL109701   | CREBBP/EP300 inhibitor 1                                                 | CRI1        | 23741        |
| 1943_at     | X51688     | cyclin A2                                                                | CCNA2       | 890          |
| 40697_at    | X51688     | cyclin A2                                                                | CCNA2       | 890          |
| 1945_at     | M25753     | cyclin B1                                                                | CCNB1       | 891          |
| 34736_at    | M25753     | cyclin B1                                                                | CCNB1       | 891          |
| 32263_at    | AL080146   | cyclin B2                                                                | CCNB2       | 9133         |
| 1925_at     | Z36714     | cyclin F                                                                 | CCNF        | 899          |
| 1996_s_at   | U17105     | cyclin F                                                                 | CCNF        | 899          |
| 35907_at    | U17105     | cyclin F                                                                 | CCNF        | 899          |
| 1792_g_at   | M68520     | cyclin-dependent kinase 2                                                | CDK2        | 1017         |
| 1833_at     | M68520     | cyclin-dependent kinase 2                                                | CDK2        | 1017         |
| 1787_at     | U22398     | cyclin-dependent kinase inhibitor 1C (p57, Kip2)                         | CDKN1C      | 1028         |
| 38673_s_at  | D64137     | cyclin-dependent kinase inhibitor 1C (p57, Kip2)                         | CDKN1C      | 1028         |
| 39545_at    | U22398     | cyclin-dependent kinase inhibitor 1C (p57, Kip2)                         | CDKN1C      | 1028         |
| 36053_at    | AF041248   | cyclin-dependent kinase inhibitor 2C (p18, inhibits CDK4)                | CDKN2C      | 1031         |

|            |          |                                                                                                |           |       |
|------------|----------|------------------------------------------------------------------------------------------------|-----------|-------|
| 1797_at    | U40343   | cyclin-dependent kinase inhibitor 2D (p19, inhibits CDK4)                                      | CDKN2D    | 1032  |
| 41497_at   | AI401296 | cyclin-dependent kinase inhibitor 2D (p19, inhibits CDK4)                                      | CDKN2D    | 1032  |
| 35818_at   | U52111   | cytochrome c, somatic                                                                          | CYCS      | 54205 |
| 38992_at   | X64229   | DEK oncogene (DNA binding)                                                                     | DEK       | 7913  |
| 886_at     | M60527   | deoxycytidine kinase                                                                           | DCK       | 1633  |
| 1610_s_at  | J00139   | dihydrofolate reductase                                                                        | DHFR      | 1719  |
| 37231_at   | D13633   | discs, large homolog 7 (Drosophila)                                                            | DLG7      | 9787  |
| 37333_at   | X63692   | DNA (cytosine-5-)-methyltransferase 1                                                          | DNMT1     | 1786  |
| 41569_at   | AI680675 | DnaJ (Hsp40) homolog, subfamily C, member 9                                                    | DNAJC9    | 23234 |
| 40201_at   | M76180   | dopa decarboxylase (aromatic L-amino acid decarboxylase)                                       | DDC       | 1644  |
| 41193_at   | AB013382 | dual specificity phosphatase 6                                                                 | DUSP6     | 1848  |
| 36410_f_at | U12431   | ELAV (embryonic lethal, abnormal vision, Drosophila)-like 2 (Hu antigen B)                     | ELAVL2    | 1993  |
| 36411_s_at | U29943   | ELAV (embryonic lethal, abnormal vision, Drosophila)-like 2 (Hu antigen B)                     | ELAVL2    | 1993  |
| 38512_r_at | D26158   | ELAV (embryonic lethal, abnormal vision, Drosophila)-like 3 (Hu antigen C)                     | ELAVL3    | 1995  |
| 40380_at   | M62843   | ELAV (embryonic lethal, abnormal vision, Drosophila)-like 4 (Hu antigen D)                     | ELAVL4    | 1996  |
| 39642_at   | AL080199 | elongation of very long chain fatty acids (FEN1/Elo2, SUR4/Elo3, yeast)-like 2                 | ELOVL2    | 54898 |
| 39481_at   | W28357   | ELOVL family member 6, elongation of long chain fatty acids (FEN1/Elo2, SUR4/Elo3-like, yeast) | ELOVL6    | 79071 |
| 40943_at   | AA009569 | ELOVL family member 6, elongation of long chain fatty acids (FEN1/Elo2, SUR4/Elo3-like, yeast) | ELOVL6    | 79071 |
| 37305_at   | U61145   | enhancer of zeste homolog 2 (Drosophila)                                                       | EZH2      | 2146  |
| 2035_s_at  | M55914   | enolase 1, (alpha)                                                                             | ENO1      | 2023  |
| 40193_at   | X51956   | enolase 2 (gamma, neuronal)                                                                    | ENO2      | 2026  |
| 37729_at   | Y08614   | exportin 1 (CRM1 homolog, yeast)                                                               | XPO1      | 7514  |
| 39070_at   | U03057   | fascin homolog 1, actin-bundling protein (Strongylocentrotus purpuratus)                       | FSCN1     | 6624  |
| 39372_at   | W26480   | fatty acid desaturase 1                                                                        | FADS1     | 3992  |
| 39373_at   | AF035284 | fatty acid desaturase 1                                                                        | FADS1     | 3992  |
| 41717_at   | AC004770 | fatty acid desaturase 1                                                                        | FADS1     | 3992  |
| 41718_g_at | AC004770 | fatty acid desaturase 1                                                                        | FADS1     | 3992  |
| 41719_i_at | AF009767 | fatty acid desaturase 1                                                                        | FADS1     | 3992  |
| 41720_r_at | AF009767 | fatty acid desaturase 1                                                                        | FADS1     | 3992  |
| 41583_at   | AC004770 | flap structure-specific endonuclease 1                                                         | FEN1      | 2237  |
| 40284_at   | AB028021 | forkhead box A2                                                                                | FOXA2     | 3170  |
| 40523_at   | AI371038 | forkhead box A2                                                                                | FOXA2     | 3170  |
| 37994_at   | X69962   | fragile X mental retardation 1                                                                 | FMR1      | 2332  |
| 37995_s_at | M67468   | fragile X mental retardation 1                                                                 | FMR1      | 2332  |
| 2039_s_at  | M14333   | FYN oncogene related to SRC, FGR, YES                                                          | FYN       | 2534  |
| 40479_at   | Z97989   | FYN oncogene related to SRC, FGR, YES                                                          | FYN       | 2534  |
| 40480_s_at | M14333   | FYN oncogene related to SRC, FGR, YES                                                          | FYN       | 2534  |
| 40481_r_at | M14333   | FYN oncogene related to SRC, FGR, YES                                                          | FYN       | 2534  |
| 156_s_at   | U64871   | G protein-coupled receptor 19                                                                  | GPR19     | 2842  |
| 34028_at   | U55312   | G protein-coupled receptor 19                                                                  | GPR19     | 2842  |
| 36152_at   | X79354   | GDP dissociation inhibitor 1                                                                   | GDI1      | 2664  |
| 37010_at   | AI203737 | general transcription factor IIA, 2, 12kDa                                                     | GTF2A2    | 2958  |
| 869_at     | U14193   | general transcription factor IIA, 2, 12kDa                                                     | GTF2A2    | 2958  |
| 37183_at   | M81883   | glutamate decarboxylase 1 (brain, 67kDa)                                                       | GAD1      | 2571  |
| 40746_at   | L20814   | glutamate receptor, ionotropic, AMPA 2                                                         | GRIA2     | 2891  |
| 39665_at   | U33267   | glycine receptor, beta                                                                         | GLRB      | 2743  |
| 34412_s_at | U59632   | glycoprotein Ib (platelet), beta polypeptide                                                   | GP1BB     | 2812  |
| 40632_at   | L20860   | glycoprotein Ib (platelet), beta polypeptide                                                   | GP1BB     | 2812  |
| 39154_at   | AI952982 | growth arrest and DNA-damage-inducible, gamma                                                  | GADD45G   | 10912 |
| 37735_at   | X13383   | guanine nucleotide binding protein (G protein), gamma 10                                       | GNB10     | 2790  |
| 33386_at   | Z97630   | H1 histone family, member 0                                                                    | H1FO      | 3005  |
| 434_at     | X03473   | H1 histone family, member 0                                                                    | H1FO      | 3005  |
| 435_g_at   | X03473   | H1 histone family, member 0                                                                    | H1FO      | 3005  |
| 40195_at   | X14850   | H2A histone family, member X                                                                   | H2AFX     | 3014  |
| 36576_at   | AF054174 | H2A histone family, member Y                                                                   | H2AFY     | 9555  |
| 39337_at   | M37583   | H2A histone family, member Z                                                                   | H2AFZ     | 3015  |
| 36654_s_at | M29065   | heterogeneous nuclear ribonucleoprotein A2/B1                                                  | HNRPA2B1  | 3181  |
| 38016_at   | M94630   | heterogeneous nuclear ribonucleoprotein D (AU-rich element RNA binding protein 1, 37kDa)       | HNRPD     | 3184  |
| 38065_at   | X62534   | high-mobility group box 2                                                                      | HMGB2     | 3148  |
| 31588_at   | AL034450 | high-mobility group box 3                                                                      | HMGB3     | 3149  |
| 33714_at   | Y10043   | high-mobility group box 3                                                                      | HMGB3     | 3149  |
| 34308_at   | U90551   | histone 1, H2ac                                                                                | HIST1H2AC | 8334  |
| 41855_at   | AF030424 | histone acetyltransferase 1                                                                    | HAT1      | 8520  |
| 34368_at   | U31814   | histone deacetylase 2                                                                          | HDAC2     | 3066  |
| 38943_at   | U36787   | holocytochrome c synthase (cytochrome c heme-lyase)                                            | HCCS      | 3052  |
| 873_at     | M26679   | homeo box A5                                                                                   | HOXA5     | 3202  |
| 31391_at   | AF040723 | huntingtin-associated protein 1 (neuroan 1)                                                    | HAP1      | 9001  |
| 33157_at   | M93119   | insulinoma-associated 1                                                                        | INSM1     | 3642  |
| 36189_at   | U10323   | interleukin enhancer binding factor 2, 45kDa                                                   | ILF2      | 3608  |
| 37210_at   | S78296   | internexin neuronal intermediate filament protein, alpha                                       | INA       | 9118  |
| 36985_at   | X17025   | isopentenyl-diphosphate delta isomerase                                                        | ID1       | 3422  |
| 40407_at   | U28386   | karyopherin alpha 2 (RAG cohort 1, importin alpha 1)                                           | KPNA2     | 3838  |
| 39057_at   | L04733   | kinesin 2 60/70kDa                                                                             | KNS2      | 3831  |
| 40726_at   | U37426   | kinesin family member 11                                                                       | KIF11     | 3832  |
| 356_at     | AB017430 | kinesin family member 22                                                                       | KIF22     | 3835  |
| 37171_at   | X67155   | kinesin family member 23                                                                       | KIF23     | 9493  |
| 36837_at   | U63743   | kinesin family member 2C                                                                       | KIF2C     | 11004 |
| 40779_at   | U59919   | kinesin-associated protein 3                                                                   | KIFAP3    | 22920 |
| 288_s_at   | L25931   | lamin B receptor                                                                               | LBR       | 3930  |
| 37985_at   | L37747   | lamin B1                                                                                       | LMNB1     | 4001  |

|            |          |                                                                                     |          |       |
|------------|----------|-------------------------------------------------------------------------------------|----------|-------|
| 36987_at   | M94362   | lamin B2                                                                            | LMNB2    | 84823 |
| 1376_at    | M36067   | ligase I, DNA, ATP-dependent                                                        | LIG1     | 3978  |
| 35371_at   | M83822   | LPS-responsive vesicle trafficking, beach and anchor containing                     | LRBA     | 987   |
| 41375_at   | AJ245416 | LSM2 homolog, U6 small nuclear RNA associated (S. cerevisiae)                       | LSM2     | 57819 |
| 39009_at   | N98670   | LSM3 homolog, U6 small nuclear RNA associated (S. cerevisiae)                       | LSM3     | 27258 |
| 36394_at   | AB012293 | lymphocyte antigen 6 complex, locus H                                               | LY6H     | 4062  |
| 1720_at    | U65410   | MAD2 mitotic arrest deficient-like 1 (yeast)                                        | MAD2L1   | 4085  |
| 1721_g_at  | U65410   | MAD2 mitotic arrest deficient-like 1 (yeast)                                        | MAD2L1   | 4085  |
| 37282_at   | AJ000186 | MAD2 mitotic arrest deficient-like 1 (yeast)                                        | MAD2L1   | 4085  |
| 36174_at   | X70326   | MARCKS-like protein                                                                 | MLP      | 65108 |
| 35312_at   | D21063   | MCM2 minichromosome maintenance deficient 2, mitotin (S. cerevisiae)                | MCM2     | 4171  |
| 33252_at   | D38073   | MCM3 minichromosome maintenance deficient 3 (S. cerevisiae)                         | MCM3     | 4172  |
| 981_at     | X74794   | MCM4 minichromosome maintenance deficient 4 (S. cerevisiae)                         | MCM4     | 4173  |
| 982_at     | X74795   | MCM5 minichromosome maintenance deficient 5, cell division cycle 46 (S. cerevisiae) | MCM5     | 4174  |
| 947_at     | D55716   | MCM7 minichromosome maintenance deficient 7 (S. cerevisiae)                         | MCM7     | 4176  |
| 37749_at   | D78611   | mesoderm specific transcript homolog (mouse)                                        | MEST     | 4232  |
| 34355_at   | AJ132917 | methyl CpG binding protein 2 (Rett syndrome)                                        | MECP2    | 4204  |
| 1708_at    | U07620   | mitogen-activated protein kinase 10                                                 | MAPK10   | 5602  |
| 1709_g_at  | U07620   | mitogen-activated protein kinase 10                                                 | MAPK10   | 5602  |
| 33538_at   | H96671   | myelin expression factor 2                                                          | MYEF2    | 50804 |
| 33539_at   | W28567   | myelin expression factor 2                                                          | MYEF2    | 50804 |
| 32188_at   | M96980   | myelin transcription factor 1                                                       | MYT1     | 4661  |
| 32189_g_at | M96980   | myelin transcription factor 1                                                       | MYT1     | 4661  |
| 32434_at   | D10522   | myristoylated alanine-rich protein kinase C substrate                               | MARCKS   | 4082  |
| 38462_at   | U64028   | NADH dehydrogenase (ubiquinone) 1 alpha subcomplex, 5, 13kDa                        | NDUFA5   | 4698  |
| 39250_at   | X78351   | nephroblastoma overexpressed gene                                                   | NOV      | 4856  |
| 1111_at    | M22092   | neural cell adhesion molecule 1                                                     | NCAM1    | 4684  |
| 1112_g_at  | M22092   | neural cell adhesion molecule 1                                                     | NCAM1    | 4684  |
| 1566_at    | S71824   | neural cell adhesion molecule 1                                                     | NCAM1    | 4684  |
| 38243_at   | X16841   | neural cell adhesion molecule 1                                                     | NCAM1    | 4684  |
| 41289_at   | AA126505 | neural cell adhesion molecule 1                                                     | NCAM1    | 4684  |
| 41290_at   | W27873   | neural cell adhesion molecule 1                                                     | NCAM1    | 4684  |
| 1539_at    | X02751   | neuroblastoma RAS viral (v-ras) oncogene homolog                                    | NRAS     | 4893  |
| 37921_at   | U61849   | neuronal pentraxin I                                                                | NPTX1    | 4884  |
| 38836_at   | AL008583 | neuronal pentraxin receptor                                                         | NPTXR    | 23467 |
| 39561_at   | AL008583 | neuronal pentraxin receptor                                                         | NPTXR    | 23467 |
| 366_s_at   | Z29066   | NIMA (never in mitosis gene a)-related kinase 2                                     | NEK2     | 4751  |
| 1521_at    | X17620   | non-metastatic cells 1, protein (NM23A) expressed in                                | NME1     | 4830  |
| 1985_s_at  | X73066   | non-metastatic cells 1, protein (NM23A) expressed in                                | NME1     | 4830  |
| 39073_at   | AL038662 | non-metastatic cells 1, protein (NM23A) expressed in                                | NME1     | 4830  |
| 38527_at   | U02493   | non-POU domain containing, octamer-binding                                          | NONO     | 4841  |
| 37819_at   | AF007130 | nuclear protein double minute 1                                                     | MDM1     | 56890 |
| 37928_at   | AA621555 | nuclear transcription factor Y, beta                                                | NFYB     | 4801  |
| 34882_at   | Y12065   | nucleolar protein 5A (56kDa with KKE/D repeat)                                      | NOL5A    | 10528 |
| 39274_at   | X58521   | nucleoporin 62kDa                                                                   | NUP62    | 23636 |
| 34099_f_at | W26056   | nucleosome assembly protein 1-like 1                                                | NAP1L1   | 4673  |
| 40634_at   | M86667   | nucleosome assembly protein 1-like 1                                                | NAP1L1   | 4673  |
| 571_at     | M86667   | nucleosome assembly protein 1-like 1                                                | NAP1L1   | 4673  |
| 36078_at   | AL080120 | odd Oz/ten-m homolog 4                                                              | ODZ4     | 26011 |
| 39701_at   | AB006625 | paternally expressed 3                                                              | PEG3     | 5178  |
| 37622_r_at | AF063020 | PC4 and SFRS1 interacting protein 1                                                 | PSIP1    | 11168 |
| 39243_s_at | U94319   | PC4 and SFRS1 interacting protein 1                                                 | PSIP1    | 11168 |
| 31811_r_at | L11667   | peptidylprolyl isomerase D (cyclophilin D)                                          | PPID     | 5481  |
| 948_s_at   | D63861   | peptidylprolyl isomerase D (cyclophilin D)                                          | PPID     | 5481  |
| 32097_at   | AB007862 | pericentrin 2 (kendrin)                                                             | PCNT2    | 5116  |
| 38435_at   | U25182   | peroxiredoxin 4                                                                     | PRDX4    | 10549 |
| 39175_at   | D25328   | phosphofructokinase, platelet                                                       | PFKP     | 5214  |
| 177_at     | U38545   | phospholipase D1, phosphatidylcholine-specific                                      | PLD1     | 5337  |
| 37780_at   | AB011131 | piccolo (presynaptic cytomatrix protein)                                            | PCLO     | 27445 |
| 1633_g_at  | U77735   | pim-2 oncogene                                                                      | PIM2     | 11040 |
| 1652_at    | U77735   | pim-2 oncogene                                                                      | PIM2     | 11040 |
| 31631_f_at | AF095288 | pituitary tumor-transforming 1                                                      | PTTG1    | 9232  |
| 40412_at   | AA203476 | pituitary tumor-transforming 1                                                      | PTTG1    | 9232  |
| 34793_s_at | M22299   | plastin 3 (T isoform)                                                               | PLS3     | 5358  |
| 34794_r_at | M22299   | plastin 3 (T isoform)                                                               | PLS3     | 5358  |
| 32445_at   | D63390   | platelet-activating factor acetylhydrolase, isoform lb, beta subunit 30kDa          | PAFAH1B2 | 5049  |
| 35800_at   | D63391   | platelet-activating factor acetylhydrolase, isoform lb, gamma subunit 29kDa         | PAFAH1B3 | 5050  |
| 40395_at   | AB007932 | plexin A2                                                                           | PLXNA2   | 5362  |
| 2015_s_at  | U14658   | PMS2 postmeiotic segregation increased 2 (S. cerevisiae)                            | PMS2     | 5395  |
| 32311_r_at | AI341574 | PMS2 postmeiotic segregation increased 2 (S. cerevisiae)                            | PMS2     | 5395  |
| 38556_at   | U14658   | PMS2 postmeiotic segregation increased 2 (S. cerevisiae)                            | PMS2     | 5395  |
| 526_s_at   | U13696   | PMS2 postmeiotic segregation increased 2 (S. cerevisiae)                            | PMS2     | 5395  |
| 37228_at   | L19559   | polo-like kinase 1 (Drosophila)                                                     | PLK1     | 5347  |
| 32703_at   | Y13115   | polo-like kinase 4 (Drosophila)                                                     | PLK4     | 10733 |
| 975_at     | Y13115   | polo-like kinase 4 (Drosophila)                                                     | PLK4     | 10733 |
| 1462_s_at  | M80397   | polymerase (DNA directed), delta 1, catalytic subunit 125kDa                        | POLD1    | 5424  |
| 31900_at   | U33429   | potassium voltage-gated channel, shaker-related subfamily, beta member 2            | KCNAB2   | 8514  |
| 31901_at   | AF044253 | potassium voltage-gated channel, shaker-related subfamily, beta member 2            | KCNAB2   | 8514  |
| 798_at     | X74330   | primase, polypeptide 1, 49kDa                                                       | PRIM1    | 5557  |
| 38839_at   | AL096719 | profilin 2                                                                          | PFN2     | 5217  |

|            |          |                                                                                                   |          |       |
|------------|----------|---------------------------------------------------------------------------------------------------|----------|-------|
| 38840_s_at | L10678   | profilin 2                                                                                        | PFN2     | 5217  |
| 1824_s_at  | J05614   | proliferating cell nuclear antigen                                                                | PCNA     | 5111  |
| 1884_s_at  | M15796   | proliferating cell nuclear antigen                                                                | PCNA     | 5111  |
| 41600_at   | U87954   | proliferation-associated 2G4, 38kDa                                                               | PA2G4    | 5036  |
| 31918_at   | U44060   | prospero-related homeobox 1                                                                       | PROX1    | 5629  |
| 36202_at   | S76965   | protein kinase (cAMP-dependent, catalytic) inhibitor alpha                                        | PKIA     | 5569  |
| 546_at     | S76965   | protein kinase (cAMP-dependent, catalytic) inhibitor alpha                                        | PKIA     | 5569  |
| 226_at     | M33336   | protein kinase, cAMP-dependent, regulatory, type I, alpha (tissue specific extinguisher 1)        | PRKAR1A  | 5573  |
| 227_g_at   | M33336   | protein kinase, cAMP-dependent, regulatory, type I, alpha (tissue specific extinguisher 1)        | PRKAR1A  | 5573  |
| 41768_at   | M33336   | protein kinase, cAMP-dependent, regulatory, type I, alpha (tissue specific extinguisher 1)        | PRKAR1A  | 5573  |
| 1246_at    | U35234   | protein tyrosine phosphatase, receptor type, S                                                    | PTPRS    | 5802  |
| 1247_g_at  | U35234   | protein tyrosine phosphatase, receptor type, S                                                    | PTPRS    | 5802  |
| 32289_at   | U40317   | protein tyrosine phosphatase, receptor type, S                                                    | PTPRS    | 5802  |
| 657_at     | L11373   | protocadherin gamma subfamily C, 3                                                                | PCDHGC3  | 5098  |
| 37776_at   | AJ011863 | putative homeodomain transcription factor 1                                                       | PHTF1    | 10745 |
| 34909_at   | AC004990 | putative homeodomain transcription factor 2                                                       | PHTF2    | 57157 |
| 34910_s_at | AL050389 | putative homeodomain transcription factor 2                                                       | PHTF2    | 57157 |
| 34911_r_at | AL050389 | putative homeodomain transcription factor 2                                                       | PHTF2    | 57157 |
| 32378_at   | M26252   | pyruvate kinase, muscle                                                                           | PKM2     | 5315  |
| 32379_f_at | W28740   | pyruvate kinase, muscle                                                                           | PKM2     | 5315  |
| 38114_at   | D38551   | RAD21 homolog (S. pombe)                                                                          | RAD21    | 5885  |
| 1872_at    | D14134   | RAD51 homolog (RecA homolog, E. coli) (S. cerevisiae)                                             | RAD51    | 5888  |
| 41342_at   | D38076   | RAN binding protein 1                                                                             | RANBP1   | 5902  |
| 32151_at   | X82260   | Ran GTPase activating protein 1                                                                   | RANGAP1  | 5905  |
| 38708_at   | AF054183 | RAN, member RAS oncogene family                                                                   | RAN      | 5901  |
| 1053_at    | M87338   | replication factor C (activator 1) 2, 40kDa                                                       | RFC2     | 5982  |
| 39269_at   | L07541   | replication factor C (activator 1) 3, 38kDa                                                       | RFC3     | 5983  |
| 1054_at    | M87339   | replication factor C (activator 1) 4, 37kDa                                                       | RFC4     | 5984  |
| 1055_g_at  | M87339   | replication factor C (activator 1) 4, 37kDa                                                       | RFC4     | 5984  |
| 38863_at   | L07540   | replication factor C (activator 1) 5, 36.5kDa                                                     | RFC5     | 5985  |
| 653_at     | L07540   | replication factor C (activator 1) 5, 36.5kDa                                                     | RFC5     | 5985  |
| 1382_at    | M63488   | replication protein A1, 70kDa                                                                     | RPA1     | 6117  |
| 38481_at   | M63488   | replication protein A1, 70kDa                                                                     | RPA1     | 6117  |
| 651_at     | L07493   | replication protein A3, 14kDa                                                                     | RPA3     | 6119  |
| 652_g_at   | L07493   | replication protein A3, 14kDa                                                                     | RPA3     | 6119  |
| 1570_f_at  | L49219   | retinoblastoma 1 (including osteosarcoma)                                                         | RB1      | 5925  |
| 1571_f_at  | L49229   | retinoblastoma 1 (including osteosarcoma)                                                         | RB1      | 5925  |
| 1672_f_at  | L41913   | retinoblastoma 1 (including osteosarcoma)                                                         | RB1      | 5925  |
| 1900_at    | L41870   | retinoblastoma 1 (including osteosarcoma)                                                         | RB1      | 5925  |
| 2044_s_at  | M15400   | retinoblastoma 1 (including osteosarcoma)                                                         | RB1      | 5925  |
| 39702_at   | U77665   | ribonuclease P/MRP 30kDa subunit                                                                  | RPP30    | 10556 |
| 34314_at   | X59543   | ribonucleotide reductase M1 polypeptide                                                           | RRM1     | 6240  |
| 36922_at   | X59618   | ribonucleotide reductase M2 polypeptide                                                           | RRM2     | 6241  |
| 37223_at   | U31116   | sarcoglycan, beta (43kDa dystrophin-associated glycoprotein)                                      | SGCB     | 6443  |
| 34265_at   | Y00757   | secretory granule, neuroendocrine protein 1 (7B2 protein)                                         | SGNE1    | 6447  |
| 37259_at   | Z81326   | serine (or cysteine) proteinase inhibitor, clade I (neuroserpin), member 1                        | SERPINI1 | 5274  |
| 34851_at   | AF011468 | serine/threonine kinase 6                                                                         | STK6     | 6790  |
| 34852_g_at | AF011468 | serine/threonine kinase 6                                                                         | STK6     | 6790  |
| 39298_at   | AB022918 | sialyltransferase 10 (alpha-2,3-sialyltransferase VI)                                             | SIAT10   | 10402 |
| 40004_at   | X91868   | sine oculis homeobox homolog 1 (Drosophila)                                                       | SIX1     | 6495  |
| 35293_at   | J04137   | Sjogren syndrome antigen A2 (60kDa, ribonucleoprotein autoantigen SS-A/Ro)                        | SSA2     | 6738  |
| 35294_at   | M25077   | Sjogren syndrome antigen A2 (60kDa, ribonucleoprotein autoantigen SS-A/Ro)                        | SSA2     | 6738  |
| 35295_g_at | M25077   | Sjogren syndrome antigen A2 (60kDa, ribonucleoprotein autoantigen SS-A/Ro)                        | SSA2     | 6738  |
| 38678_at   | AA733050 | small nuclear ribonucleoprotein polypeptide E                                                     | SNRPE    | 6635  |
| 38679_g_at | AA733050 | small nuclear ribonucleoprotein polypeptide E                                                     | SNRPE    | 6635  |
| 38680_at   | M21259   | small nuclear ribonucleoprotein polypeptide E                                                     | SNRPE    | 6635  |
| 37337_at   | A1803447 | small nuclear ribonucleoprotein polypeptide G                                                     | SNRPG    | 6637  |
| 37502_at   | AF092563 | SMC2 structural maintenance of chromosomes 2-like 1 (yeast)                                       | SMC2L1   | 10592 |
| 34878_at   | AB019987 | SMC4 structural maintenance of chromosomes 4-like 1 (yeast)                                       | SMC4L1   | 10051 |
| 36013_at   | AF006621 | solute carrier family 30 (zinc transporter), member 9                                             | SLC30A9  | 10463 |
| 1798_at    | U41060   | solute carrier family 39 (zinc transporter), member 6                                             | SLC39A6  | 25800 |
| 37489_s_at | U05596   | solute carrier family 4, anion exchanger, member 3                                                | SLC4A3   | 6508  |
| 37490_at   | L27213   | solute carrier family 4, anion exchanger, member 3                                                | SLC4A3   | 6508  |
| 35171_at   | AB029006 | spastic paraplegia 4 (autosomal dominant; spastin)                                                | SPG4     | 6683  |
| 351_f_at   | D28423   | splicing factor, arginine/serine-rich 3                                                           | SFRS3    | 6428  |
| 40457_at   | AF038250 | splicing factor, arginine/serine-rich 3                                                           | SFRS3    | 6428  |
| 35839_at   | D78130   | squalene epoxidase                                                                                | SQLE     | 6713  |
| 34569_at   | U23752   | SRY (sex determining region Y)-box 11                                                             | SOX11    | 6664  |
| 33108_i_at | L07335   | SRY (sex determining region Y)-box 2                                                              | SOX2     | 6657  |
| 33109_f_at | L07335   | SRY (sex determining region Y)-box 2                                                              | SOX2     | 6657  |
| 33110_at   | A1356682 | SRY (sex determining region Y)-box 2                                                              | SOX2     | 6657  |
| 33131_at   | X70683   | SRY (sex determining region Y)-box 2                                                              | SOX2     | 6657  |
| 1782_s_at  | M31303   | SRY (sex determining region Y)-box 4                                                              | SOX4     | 6659  |
| 36913_at   | U75679   | stathmin 1/oncoprotein 18                                                                         | STMN1    | 3925  |
| 41034_s_at | U92315   | stem-loop (histone) binding protein                                                               | SLBP     | 7884  |
| 38994_at   | AF037989 | sulfotransferase family, cytosolic, 2B, member 1                                                  | SULT2B1  | 6820  |
| 40968_at   | AB004904 | suppressor of cytokine signaling 2                                                                | SOCS2    | 8835  |
| 39132_at   | AB010882 | suppressor of cytokine signaling 3                                                                | SOCS3    | 9021  |
| 40416_at   | U04847   | SWI/SNF related, matrix associated, actin dependent regulator of chromatin, subfamily a, member 5 | SMARCA5  | 8467  |
| 40810_at   | U66615   | SWI/SNF related, matrix associated, actin dependent regulator of chromatin, subfamily b, member 1 | SMARCB1  | 6598  |
|            |          | SWI/SNF related, matrix associated, actin dependent regulator of chromatin, subfamily c, member 1 | SMARCC1  | 6599  |

|            |          |                                                                                                   |          |       |
|------------|----------|---------------------------------------------------------------------------------------------------|----------|-------|
| 452_at     | U66615   | SWI/SNF related, matrix associated, actin dependent regulator of chromatin, subfamily c, member 1 | SMARCC1  | 6599  |
| 38484_at   | D21267   | synaptosomal-associated protein, 25kDa                                                            | SNAP25   | 6616  |
| 41675_at   | AB014556 | synaptosomal-associated protein, 91kDa homolog (mouse)                                            | SNAP91   | 9892  |
| 40075_at   | M55047   | synaptotagmin I                                                                                   | SYT1     | 6857  |
| 33942_s_at | AF004563 | syntaxin binding protein 1                                                                        | STXBP1   | 6812  |
| 37291_r_at | L08850   | synuclein, alpha (non A4 component of amyloid precursor)                                          | SNCA     | 6622  |
| 193_at     | U21858   | TAF9 RNA polymerase II, TATA box binding protein (TBP)-associated factor, 32kDa                   | TAF9     | 6880  |
| 39065_s_at | D83327   | tetratricopeptide repeat domain 3                                                                 | TTC3     | 7267  |
| 1505_at    | D00596   | thymidylate synthetase                                                                            | TYMS     | 7298  |
| 37899_at   | X02308   | thymidylate synthetase                                                                            | TYMS     | 7298  |
| 40865_at   | U51166   | thymine-DNA glycosylase                                                                           | TDG      | 6996  |
| 32682_at   | U09087   | thymopoietin                                                                                      | TMPO     | 7112  |
| 32683_at   | U18271   | thymopoietin                                                                                      | TMPO     | 7112  |
| 32274_r_at | AF052148 | thyroid autoantigen 70kDa (Ku antigen)                                                            | G22P1    | 2547  |
| 32766_at   | Z83840   | thyroid autoantigen 70kDa (Ku antigen)                                                            | G22P1    | 2547  |
| 41626_at   | AF098162 | timeless homolog (Drosophila)                                                                     | TIMELESS | 8914  |
| 1592_at    | J04088   | topoisomerase (DNA) II alpha 170kDa                                                               | TOP2A    | 7153  |
| 40145_at   | AI375913 | topoisomerase (DNA) II alpha 170kDa                                                               | TOP2A    | 7153  |
| 904_s_at   | L47276   | topoisomerase (DNA) II alpha 170kDa                                                               | TOP2A    | 7153  |
| 34825_at   | AL031775 | TRAF and TNF receptor associated protein                                                          | TTRAP    | 51567 |
| 39742_at   | U59863   | TRAF family member-associated NFkB activator                                                      | TANK     | 10010 |
| 1399_at    | L34587   | transcription elongation factor B (SIII), polypeptide 1 (15kDa, elongin C)                        | TCEB1    | 6921  |
| 39426_at   | AF017789 | transcription elongation regulator 1                                                              | TCERG1   | 10915 |
| 36605_at   | M74719   | transcription factor 4                                                                            | TCF4     | 6925  |
| 1670_at    | L23959   | transcription factor Dp-1                                                                         | TFDP1    | 7027  |
| 37757_at   | L23959   | transcription factor Dp-1                                                                         | TFDP1    | 7027  |
| 32083_at   | AF027826 | transmembrane 7 superfamily member 1 (upregulated in kidney)                                      | TM7SF1   | 7107  |
| 33107_at   | AB020705 | tripartite motif-containing 37                                                                    | TRIM37   | 4591  |
| 34729_at   | AB029037 | trophinin                                                                                         | TRO      | 7216  |
| 34730_g_at | AB029037 | trophinin                                                                                         | TRO      | 7216  |
| 33866_at   | X05276   | tropomyosin 4                                                                                     | TPM4     | 7171  |
| 572_at     | M86699   | TTK protein kinase                                                                                | TTK      | 7272  |
| 36591_at   | X06956   | tubulin, alpha 1 (testis specific)                                                                | TUBA1    | 7277  |
| 429_f_at   | X00734   | tubulin, beta, 4                                                                                  | TUBB4    | 10381 |
| 471_f_at   | U47634   | tubulin, beta, 4                                                                                  | TUBB4    | 10381 |
| 38699_at   | X00734   | tubulin, beta, 5                                                                                  | TUBB5    | 10382 |
| 33346_r_at | M61764   | tubulin, gamma 1                                                                                  | TUBG1    | 7283  |
| 38353_at   | AF042378 | tubulin, gamma complex associated protein 3                                                       | TUBGCP3  | 10426 |
| 36517_at   | M96982   | U2(RNU2) small nuclear RNA auxiliary factor 1                                                     | U2AF1    | 7307  |
| 36990_at   | X04741   | ubiquitin carboxyl-terminal esterase L1 (ubiquitin thiolesterase)                                 | UCHL1    | 7345  |
| 34383_at   | AB014458 | ubiquitin specific protease 1                                                                     | USP1     | 7398  |
| 37750_at   | AF049140 | ubiquitin-conjugating enzyme E2 variant 2                                                         | UBE2V2   | 7336  |
| 39293_at   | Y15062   | UDP-Gal:betaGlcNAc beta 1,3-galactosyltransferase, polypeptide 3                                  | B3GALT3  | 8706  |
| 37686_s_at | Y09008   | uracil-DNA glycosylase                                                                            | UNG      | 7374  |
| 1888_s_at  | X06182   | v-kit Hardy-Zuckerman 4 feline sarcoma viral oncogene homolog                                     | KIT      | 3815  |
| 1471_at    | U22376   | v-myb myeloblastosis viral oncogene homolog (avian)                                               | MYB      | 4602  |
| 1472_g_at  | U22376   | v-myb myeloblastosis viral oncogene homolog (avian)                                               | MYB      | 4602  |
| 1473_s_at  | U22376   | v-myb myeloblastosis viral oncogene homolog (avian)                                               | MYB      | 4602  |
| 1474_s_at  | U22376   | v-myb myeloblastosis viral oncogene homolog (avian)                                               | MYB      | 4602  |
| 1475_s_at  | U22376   | v-myb myeloblastosis viral oncogene homolog (avian)                                               | MYB      | 4602  |
| 1476_s_at  | U22376   | v-myb myeloblastosis viral oncogene homolog (avian)                                               | MYB      | 4602  |
| 2042_s_at  | M15024   | v-myb myeloblastosis viral oncogene homolog (avian)                                               | MYB      | 4602  |
| 41854_at   | M13666   | v-myb myeloblastosis viral oncogene homolog (avian)                                               | MYB      | 4602  |
| 607_s_at   | M10321   | von Willebrand factor                                                                             | VWF      | 7450  |
| 39253_s_at | M29893   | v-ral simian leukemia viral oncogene homolog A (ras related)                                      | RALA     | 5898  |
| 40928_at   | W26496   | WD repeat and SOCS box-containing 1                                                               | WSB1     | 26118 |
| 40929_at   | AI365246 | WD repeat and SOCS box-containing 1                                                               | WSB1     | 26118 |
