# Supplementary material
Source: PubMed Central journal article supplement (PMC1174979)
Supplement: pnas_0500756102_4.pdf [file pnas_0500756102_4.pdf]

Table 3. Probesets (639) representing 596 transcripts identified by SAM that are enriched  $\geq 2$ -fold in PNEC monolayers, neurospheres, and xenografts compared to normal mouse prostate

| Probeset ID | GenBank ID | Gene Name                                                                             | Gene Symbol | LocusLink ID |
|-------------|------------|---------------------------------------------------------------------------------------|-------------|--------------|
| 102144_f_at | AW048189   | UI-M-BH1-amc-d-12-0-UI.s1 Mus musculus cDNA                                           | ---         | ---          |
| 161316_f_at | AV353105   | AV353105 Mus musculus cDNA                                                            | ---         | ---          |
| 98524_f_at  | A1848479   | UI-M-AP1-agf-a-10-0-UI.s2 Mus musculus cDNA                                           | ---         | ---          |
| 98989_at    | AF057368   | 7-dehydrocholesterol reductase                                                        | Dhcr7       | 13360        |
| 103734_at   | AA985771   | Abelson helper integration site                                                       | Ahi1        | 52906        |
| 104372_at   | A1836883   | abhydrolase domain containing 8                                                       | Abhd8       | 64296        |
| 102238_at   | M95603     | achaete-scute complex homolog-like 1 (Drosophila)                                     | Ascl1       | 17172        |
| 93219_at    | Y17343     | acid phosphatase 1, soluble                                                           | Acp1        | 11431        |
| 96052_at    | A1852457   | acid phosphatase 1, soluble                                                           | Acp1        | 11431        |
| 96054_f_at  | Y17345     | acid phosphatase 1, soluble                                                           | Acp1        | 11431        |
| 104390_at   | A1836916   | acidic (leucine-rich) nuclear phosphoprotein 32 family, member A                      | Anp32a      | 11737        |
| 97556_at    | A1843178   | acidic (leucine-rich) nuclear phosphoprotein 32 family, member E                      | Anp32e      | 66471        |
| 160762_at   | A1846185   | active BCR-related gene                                                               | Abr         | 109934       |
| 94248_at    | M62419     | adaptor-related protein complex AP-1, mu subunit 1                                    | Ap1m1       | 11767        |
| 104246_at   | A1852340   | additional sex combs like 1 (Drosophila)                                              | Asx1        | 228790       |
| 101439_at   | AW122716   | ADP-ribosylation factor-like 6                                                        | Arf6        | 56297        |
| 160371_at   | AW122878   | ADP-ribosylation factor-like 6 interacting protein 1                                  | Arf6ip1     | 54208        |
| 98924_at    | Y08027     | ADP-ribosyltransferase 3                                                              | Art3        | 109979       |
| 160903_at   | U70210     | amyloid beta (A4) precursor protein-binding, family B, member 2                       | Apbb2       | 11787        |
| 93498_s_at  | M97216     | amyloid beta (A4) precursor-like protein 2                                            | Aplp2       | 11804        |
| 93967_at    | A1850979   | anaphase promoting complex subunit 11 homolog (yeast)                                 | Anapc11     | 66156        |
| 95100_at    | A1847314   | anaphase-promoting complex subunit 5                                                  | Anapc5      | 59008        |
| 92210_at    | AF004326   | angiopoietin 2                                                                        | Agpt2       | 11601        |
| 96784_at    | AW123269   | anillin, actin binding protein (scraps homolog, Drosophila)                           | Anln        | 68743        |
| 93037_i_at  | M69260     | annexin A1                                                                            | Anxa1       | 16952        |
| 93038_f_at  | M69260     | annexin A1                                                                            | Anxa1       | 16952        |
| 99457_at    | X82786     | antigen identified by monoclonal antibody Ki 67                                       | Mki67       | 17345        |
| 97471_at    | A1848442   | armadillo repeat containing protein                                                   | Arcp        | 74252        |
| 97211_at    | A1747444   | armadillo repeat containing, X-linked 2                                               | Armcx2      | 67416        |
| 97273_at    | A1845953   | arsenate resistance protein 2                                                         | Ars2        | 83701        |
| 98914_at    | A1853634   | ASF1 anti-silencing function 1 homolog A (S. cerevisiae)                              | Asf1a       | 66403        |
| 97364_at    | AW213865   | ASF1 anti-silencing function 1 homolog B (S. cerevisiae)                              | Asf1b       | 66929        |
| 103300_at   | AW124239   | ATP-binding cassette, sub-family B (MDR/TAP), member 7                                | Abcb7       | 11306        |
| 101521_at   | AB013819   | baculoviral IAP repeat-containing 5                                                   | Birc5       | 11799        |
| 101105_at   | AB025349   | barrier to autointegration factor 1                                                   | Banf1       | 23825        |
| 95462_at    | AW060951   | basic leucine zipper and W2 domains 2                                                 | Bzw2        | 66912        |
| 101583_at   | M64292     | B-cell translocation gene 2, anti-proliferative                                       | Blg2        | 12227        |
| 96255_at    | AF067395   | BCL2/adenovirus E1B 19kDa-interacting protein 3-like                                  | Bnip3l      | 12177        |
| 100539_at   | A1841279   | brain acyl-CoA hydrolase                                                              | Bach        | 70025        |
| 102727_at   | X55573     | brain derived neurotrophic factor                                                     | Bdnf        | 12064        |
| 102976_at   | U32446     | breast cancer 1                                                                       | Brc1        | 12189        |
| 102911_at   | U89652     | breast cancer 2                                                                       | Brc2        | 12190        |
| 103081_at   | AA863928   | bromodomain adjacent to zinc finger domain, 1B                                        | Baz1b       | 22385        |
| 93147_f_at  | A1839880   | bruno-like 4, RNA binding protein (Drosophila)                                        | Bruno4      | 108013       |
| 104097_at   | AF002823   | budding uninhibited by benzimidazoles 1 homolog (S. cerevisiae)                       | Bub1        | 12235        |
| 101961_at   | U67327     | budding uninhibited by benzimidazoles 3 homolog (S. cerevisiae)                       | Bub3        | 12237        |
| 92988_i_at  | D86214     | Ca <sup>2+</sup> -dependent activator protein for secretion                           | Cadps       | 27062        |
| 92989_f_at  | D86214     | Ca <sup>2+</sup> -dependent activator protein for secretion                           | Cadps       | 27062        |
| 102852_at   | M31131     | cadherin 2                                                                            | Cdh2        | 12558        |
| 99536_at    | AB016080   | calcium and integrin binding family member 2                                          | Cib2        | 56506        |
| 98386_s_at  | U17869     | calcium channel, voltage-dependent, L type, alpha 1C subunit                          | Cacna1c     | 12288        |
| 102632_at   | AF062378   | calmodulin binding protein 1                                                          | Calmbp1     | 12316        |
| 97259_at    | AJ005983   | cAMP-regulated phosphoprotein 19                                                      | Arpp19      | 59046        |
| 96725_at    | A1838398   | capicua homolog (Drosophila)                                                          | Cic         | 71722        |
| 102773_at   | X61397     | carbonic anhydrase 8                                                                  | Car8        | 12319        |
| 99642_i_at  | X61232     | carboxypeptidase E                                                                    | Cpe         | 12876        |
| 99643_f_at  | X61232     | carboxypeptidase E                                                                    | Cpe         | 12876        |
| 102215_at   | Y10495     | carnitine deficiency-associated gene expressed in ventricle 1                         | Cdv1        | 12589        |
| 98436_s_at  | U54803     | caspase 3, apoptosis related cysteine protease                                        | Casp3       | 12367        |
| 98437_at    | U63720     | caspase 3, apoptosis related cysteine protease                                        | Casp3       | 12367        |
| 104290_at   | A1847837   | caspase 8 associated protein 2                                                        | Casp8ap2    | 26885        |
| 92228_at    | D25282     | catenin alpha 2                                                                       | Catna2      | 12386        |
| 99856_r_at  | A1852919   | catenin delta 2                                                                       | Catnd2      | 18163        |
| 99535_at    | AW047630   | CCR4 carbon catabolite repression 4-like (S. cerevisiae)                              | Ccrn4       | 12457        |
| 97312_at    | AB014464   | CD164 antigen                                                                         | Cd164       | 53599        |
| 103611_at   | AB012693   | CD47 antigen (Rh-related antigen, integrin-associated signal transducer)              | Cd47        | 16423        |
| 95020_at    | A1848868   | CD47 antigen (Rh-related antigen, integrin-associated signal transducer)              | Cd47        | 16423        |
| 97527_at    | AA681998   | CDC28 protein kinase regulatory subunit 2                                             | Cks2        | 66197        |
| 160897_at   | AW060889   | cDNA sequence BC005662                                                                | BC005662    | 210992       |
| 103212_at   | A1314784   | cDNA sequence BC006933                                                                | BC006933    | 217946       |
| 161076_at   | A1462312   | cDNA sequence BC023882                                                                | BC023882    | 231123       |
| 103449_at   | AA795923   | cDNA sequence BC040823                                                                | BC040823    | 241846       |
| 93423_at    | A1844772   | cDNA sequence BC058638                                                                | BC058638    | 223732       |
| 100128_at   | M38724     | cell division cycle 2 homolog A (S. pombe)                                            | Cdc2a       | 12534        |
| 96319_at    | AW061324   | cell division cycle 20 homolog (S. cerevisiae)                                        | Cdc20       | 107995       |
| 102934_s_at | L16926     | cell division cycle 25 homolog C (S. cerevisiae)                                      | Cdc25c      | 12532        |
| 102935_at   | U15562     | cell division cycle 25 homolog C (S. cerevisiae)                                      | Cdc25c      | 12532        |
| 103821_at   | AJ223087   | cell division cycle 6 homolog (S. cerevisiae)                                         | Cdc6        | 23834        |
| 103797_at   | AB019388   | cell division cycle 7 (S. cerevisiae)                                                 | Cdc7        | 12545        |
| 94217_f_at  | AC002397   | cell division cycle associated 3                                                      | Cdca3       | 14793        |
| 104733_at   | AW047001   | centrin 2                                                                             | Cetn2       | 26370        |
| 100616_at   | AF012710   | centromere autoantigen A                                                              | Cenpa       | 12615        |
| 98770_at    | AF012708   | centromere autoantigen C                                                              | Cenpc       | 12617        |
| 160900_at   | A1847897   | cGMP-dependent protein kinase anchoring protein                                       | Gkap42      | 56278        |
| 103064_at   | AF016583   | checkpoint kinase 1 homolog (S. pombe)                                                | Chek1       | 12649        |
| 102853_at   | Y15128     | chondroitin sulfate proteoglycan 6                                                    | Cspg6       | 13006        |
| 100890_at   | A1173038   | chromatin assembly factor 1, subunit B (p60)                                          | Chaf1b      | 110749       |
| 104259_at   | X99641     | chromobox homolog 5 (Drosophila HP1a)                                                 | Cbx5        | 12419        |
| 95614_at    | A1852086   | chromobox homolog 5 (Drosophila HP1a)                                                 | Cbx5        | 12419        |
| 92422_at    | M64278     | chromogranin A                                                                        | Chga        | 12652        |
| 92841_f_at  | X51429     | chromogranin B                                                                        | Chgb        | 12653        |
| 99138_at    | AA756292   | chromosome condensation 1                                                             | Chc1        | 100088       |
| 104317_at   | AW123099   | chromosome segregation 1-like (S. cerevisiae)                                         | Cse1l       | 110750       |
| 98560_at    | A1849152   | clathrin, light polypeptide (Lcb)                                                     | Cltb        | 74325        |
| 104399_at   | A1850965   | cleavage stimulation factor, 3' pre-RNA subunit 2                                     | Cstf2       | 108062       |
| 104126_at   | A1854864   | cleavage stimulation factor, 3' pre-RNA subunit 2, tau                                | Cstf2t      | 83410        |
| 100466_f_at | AA655823   | Clone IMAGE:3371572, mRNA                                                             | ---         | 381633       |
| 95313_at    | AW046032   | coagulation factor II (thrombin) receptor                                             | F2r         | 14062        |
| 95474_at    | AW123850   | coagulation factor II (thrombin) receptor                                             | F2r         | 14062        |
| 93815_at    | A1839425   | coiled-coil-helix-coiled-coil-helix domain containing 3                               | Chchd3      | 66075        |
| 104383_at   | AB006714   | collapsin response mediator protein 1                                                 | Crmp1       | 12933        |
| 98782_at    | D38613     | complexin 2                                                                           | Cplx2       | 12890        |
| 92936_at    | X14943     | contactin 1                                                                           | Cntn1       | 12805        |
| 97406_at    | AW122258   | core-binding factor, runt domain, alpha subunit 2, translocated to, 2 homolog (human) | Cbfa2t2     | 12396        |

|             |          |                                                                                |             |        |
|-------------|----------|--------------------------------------------------------------------------------|-------------|--------|
| 160565_at   | Z13969   | creatine kinase, mitochondrial 1, ubiquitous                                   | Ckmt1       | 12716  |
| 99191_at    | A1844939 | CREBBP/EP300 inhibitory protein 1                                              | Cri1        | 58521  |
| 99179_at    | A1846233 | CUE domain containing 2                                                        | Cuedc2      | 67116  |
| 94002_at    | A1849838 | cullin 1                                                                       | Cul1        | 26965  |
| 99186_at    | X75483   | cyclin A2                                                                      | Cna2        | 12428  |
| 160159_at   | X64713   | cyclin B1                                                                      | Cnb1        | 268697 |
| 94294_at    | X66032   | cyclin B2                                                                      | Cnb2        | 12442  |
| 99073_at    | Z47766   | cyclin F                                                                       | Conf        | 12449  |
| 94412_at    | AJ223733 | cyclin-dependent kinase 2                                                      | Cdk2        | 12566  |
| 101017_at   | AA791962 | cyclin-dependent kinase 4                                                      | Cdk4        | 12567  |
| 95471_at    | U22399   | cyclin-dependent kinase inhibitor 1C (P57)                                     | Cdkn1c      | 12577  |
| 160638_at   | U19596   | cyclin-dependent kinase inhibitor 2C (p18, inhibits CDK4)                      | Cdkn2c      | 12580  |
| 94521_at    | U19597   | cyclin-dependent kinase inhibitor 2D (p19, inhibits CDK4)                      | Cdkn2d      | 12581  |
| 160623_at   | A1847045 | cyclin-dependent kinase-like 2 (CDC2-related kinase)                           | Cdkl2       | 53886  |
| 98132_at    | X01756   | cytochrome c, somatic                                                          | Cycc        | 13063  |
| 104322_at   | A1121796 | cytoskeleton associated protein 2                                              | Ckap2       | 80986  |
| 92678_at    | AA982686 | DEAD (Asp-Glu-Ala-Asp) box polypeptide 25                                      | Ddx25       | 30959  |
| 160286_at   | AA733594 | DEK oncogene (DNA binding)                                                     | Dek         | 110052 |
| 92931_at    | X80903   | delta-like 1 (Drosophila)                                                      | Dll1        | 13388  |
| 93582_at    | AF080580 | demethyl-Q 7                                                                   | Coq7        | 12850  |
| 98071_f_at  | X77731   | deoxycytidine kinase                                                           | Dck         | 13178  |
| 98619_at    | AW121709 | deoxythymidylate kinase                                                        | Dtymk       | 21915  |
| 104547_at   | J00388   | dihydrofolate reductase                                                        | Dhfr        | 13361  |
| 98489_at    | AI510131 | discs, large homolog 7 (Drosophila)                                            | Dlg7        | 218977 |
| 101445_at   | AF036008 | DNA methyltransferase (cytosine-5) 1                                           | Dnmt1       | 13433  |
| 96772_at    | J04620   | DNA primase, p49 subunit                                                       | Prim1       | 19075  |
| 95549_at    | D13545   | DNA primase, p58 subunit                                                       | Prim2       | 19076  |
| 94526_at    | A1848453 | DNA segment, Chr 10, ERATO Doi 214, expressed                                  | D10Ert214e  | 52637  |
| 160455_s_at | AW123786 | DNA segment, Chr 10, ERATO Doi 749, expressed                                  | D10Ert749e  | 52696  |
| 99087_at    | AW060179 | DNA segment, Chr 10, ERATO Doi 749, expressed                                  | D10Ert749e  | 52696  |
| 94044_at    | AA692708 | DNA segment, Chr 11, ERATO Doi 530, expressed                                  | D11Ert530e  | 52615  |
| 104333_at   | U69488   | DNA segment, Chr 17, human D6S56E 5                                            | D17H6S56E-5 | 110956 |
| 97295_at    | AW122331 | DNA segment, Chr 4, ERATO Doi 421, expressed                                   | D4Ert421e   | 52276  |
| 161062_r_at | AW049573 | DNA segment, Chr 5, Brigham & Women's Genetics 0860 expressed                  | D5Bwg0860e  | 52822  |
| 104418_at   | AA796868 | DNA segment, Chr 6, ERATO Doi 365, expressed                                   | D6Ert365e   | 52265  |
| 160203_at   | AA840409 | DnaJ (Hsp40) homolog, subfamily C, member 9                                    | Dnaj9       | 108671 |
| 160074_at   | AF071068 | dopa decarboxylase                                                             | Ddc         | 13195  |
| 97740_at    | AI642662 | dual specificity phosphatase 16                                                | Dusp16      | 70686  |
| 93285_at    | AA455584 | dual specificity phosphatase 6                                                 | Dusp6       | 67603  |
| 104079_at   | AW124678 | dual-specificity tyrosine-(Y)-phosphorylation regulated kinase 1a              | Dyrk1a      | 13548  |
| 94246_at    | J04103   | E26 avian leukemia oncogene 2, 3' domain                                       | Ets2        | 23872  |
| 161427_f_at | AV301683 | E2F transcription factor 1                                                     | E2f1        | 13555  |
| 97411_at    | L11316   | ect2 oncogene                                                                  | Ect2        | 13605  |
| 92317_at    | U29088   | ELAV (embryonic lethal, abnormal vision, Drosophila)-like 2 (Hu antigen B)     | Elav2       | 15569  |
| 92239_at    | U29148   | ELAV (embryonic lethal, abnormal vision, Drosophila)-like 3 (Hu antigen C)     | Elav3       | 15571  |
| 92361_at    | D31953   | ELAV (embryonic lethal, abnormal vision, Drosophila)-like 4 (Hu antigen D)     | Elav4       | 15572  |
| 94393_r_at  | AI317360 | elongation of very long chain fatty acids (FEN1/Elo2, SUR4/Elo3, yeast)-like 2 | Elov2       | 54326  |
| 103665_at   | AW122523 | ELOVL family member 6, elongation of long chain fatty acids (yeast)            | Elov6       | 170439 |
| 101560_at   | AW061330 | embigin                                                                        | Emb         | 13723  |
| 160667_at   | U72519   | Ena-vasodilator stimulated phosphoprotein                                      | Evl         | 14026  |
| 103456_at   | A1841800 | endothelin converting enzyme 1                                                 | Ece1        | 230857 |
| 99917_at    | U52951   | enhancer of zeste homolog 2 (Drosophila)                                       | Ezh2        | 14056  |
| 160568_at   | A1841389 | enolase 1, alpha non-neuron                                                    | Eno1        | 13806  |
| 99045_at    | AC002397 | enolase 2, gamma neuronal                                                      | Eno2        | 13807  |
| 94429_at    | L26479   | eukaryotic translation elongation factor 1 alpha 2                             | Eef1a2      | 13628  |
| 94228_at    | AW123788 | exportin 1, CRM1 homolog (yeast)                                               | Xpo1        | 103573 |
| 92794_f_at  | M35970   | expressed in non-metastatic cells 1, protein                                   | Nme1        | 18102  |
| 94367_at    | A1850362 | expressed sequence AA407809                                                    | AA407809    | 80914  |
| 96541_at    | A1838636 | expressed sequence AA408420                                                    | AA408420    | 103542 |
| 94359_at    | A1849556 | expressed sequence AA960558                                                    | AA960558    | 101476 |
| 95503_at    | U95498   | expressed sequence A1839562                                                    | A1839562    | 56772  |
| 104260_at   | AW123061 | expressed sequence AW112037                                                    | AW112037    | 98667  |
| 98982_at    | AW046443 | expressed sequence AW547477                                                    | AW547477    | 103472 |
| 160981_at   | A1837246 | expressed sequence C77170                                                      | C77170      | 97949  |
| 95963_at    | C77386   | expressed sequence C77370                                                      | C77370      | 245555 |
| 103308_at   | AI450597 | expressed sequence C79407                                                      | C79407      | 217653 |
| 95984_at    | AI586160 | expressed sequence C79468                                                      | C79468      | 97294  |
| 93159_at    | AW122995 | expressed sequence R74640                                                      | R74640      | 96937  |
| 92838_at    | L37326   | fascin homolog 1, actin bundling protein (Strongylocentrotus) purpuratus)      | Fscn1       | 14086  |
| 160391_at   | A1853364 | fatty acid desaturase 1                                                        | Fads1       | 76267  |
| 97124_at    | U42384   | fibroblast growth factor inducible 15                                          | Fin15       | 14210  |
| 160648_at   | AI047076 | fidgetin-like 1                                                                | Figl1       | 60530  |
| 97327_at    | L26320   | flap structure specific endonuclease 1                                         | Fen1        | 14156  |
| 93950_at    | L10409   | forkhead box A2                                                                | Foxa2       | 15376  |
| 98306_g_at  | Y11245   | forkhead box M1                                                                | Foxm1       | 14235  |
| 104415_at   | AA833293 | forkhead box P1                                                                | Foxp1       | 108655 |
| 96183_at    | AW122985 | forkhead box P1                                                                | Foxp1       | 108655 |
| 98441_at    | L23971   | fragile X mental retardation syndrome 1 homolog                                | Fmr1        | 14265  |
| 100133_at   | M27266   | Fyn proto-oncogene                                                             | Fyn         | 14360  |
| 100438_at   | U46923   | G protein-coupled receptor 19                                                  | Gpr19       | 14760  |
| 103318_at   | M74516   | GA repeat binding protein, beta 1                                              | Gabpb1      | 14391  |
| 102967_at   | Y17850   | ganglioside-induced differentiation-associated-protein 1                       | Gdap1       | 14545  |
| 160069_at   | AA681520 | geminin                                                                        | Gmn         | 57441  |
| 92180_at    | A1851599 | gene model 461, (NCBI)                                                         | Gm461       | 243529 |
| 98101_at    | A1851798 | general transcription factor II A, 2                                           | Gtf2a2      | 235459 |
| 94811_s_at  | AJ002366 | general transcription factor II H, polypeptide 1                               | Gtf2h1      | 14884  |
| 92945_at    | L32372   | glutamate receptor, ionotropic, AMPA2 (alpha 2)                                | Gria2       | 14800  |
| 92946_f_at  | L32372   | glutamate receptor, ionotropic, AMPA2 (alpha 2)                                | Gria2       | 14800  |
| 92947_s_at  | X57498   | glutamate receptor, ionotropic, AMPA2 (alpha 2)                                | Gria2       | 14800  |
| 104409_at   | D10011   | glutamate receptor, ionotropic, kainate 5 (gamma 2)                            | Grik5       | 14809  |
| 103061_at   | Z49976   | glutamic acid decarboxylase 1                                                  | Gad1        | 14415  |
| 96336_at    | A1844626 | glycine amidinotransferase (L-arginine:glycine amidinotransferase)             | Gatm        | 67092  |
| 104449_at   | X81202   | glycine receptor, beta subunit                                                 | Glrb        | 14658  |
| 100597_at   | AW049730 | glycogenin 1                                                                   | Gyg1        | 27357  |
| 96337_at    | AF033350 | glycoprotein lb, beta polypeptide                                              | Gp1bb       | 14724  |
| 101979_at   | AF055638 | growth arrest and DNA-damage-inducible 45 gamma                                | Gadd45g     | 23882  |
| 102761_at   | AF041060 | GrpE-like 2, mitochondrial                                                     | Grpel2      | 17714  |
| 103436_at   | U87965   | GTP binding protein 1                                                          | Gtpbp1      | 14904  |
| 102313_at   | L09737   | GTP cyclohydrolase 1                                                           | Gch         | 14528  |
| 99175_at    | A1843396 | guanine nucleotide binding protein (G protein), gamma 10                       | Gng10       | 14700  |
| 94986_at    | AF069953 | guanine nucleotide binding protein (G protein), gamma 3 subunit                | Gng3        | 14704  |
| 97313_at    | U07950   | guanosine diphosphate (GDP) dissociation inhibitor 1                           | Gdi1        | 14567  |
| 95419_at    | M29260   | H1 histone family, member 0                                                    | H1f0        | 14958  |
| 96710_at    | A1854262 | H2A histone family, member V                                                   | H2av        | 77605  |
| 93019_at    | Z35401   | H2A histone family, member X                                                   | H2afx       | 15270  |
| 160399_r_at | AA646966 | H2A histone family, member Y                                                   | H2afy       | 26914  |
| 97452_at    | A1853078 | H2A histone family, member Y                                                   | H2afy       | 26914  |

|             |          |                                                                                |            |        |
|-------------|----------|--------------------------------------------------------------------------------|------------|--------|
| 101954_at   | U70494   | H2A histone family, member Z                                                   | H2afz      | 51788  |
| 97334_at    | AW048812 | hairy and enhancer of split 6 (Drosophila)                                     | Hes6       | 55927  |
| 101562_at   | U08215   | heat shock 70kDa protein 14                                                    | Hspa14     | 50497  |
| 93228_at    | U25691   | helicase, lymphoid specific                                                    | Hells      | 15201  |
| 93276_at    | U90123   | hematological and neurological expressed sequence 1                            | Hn1        | 15374  |
| 93117_at    | AF073993 | heterogeneous nuclear ribonucleoprotein A2/B1                                  | Hnrpa2b1   | 53379  |
| 93118_at    | AI844131 | heterogeneous nuclear ribonucleoprotein A2/B1                                  | Hnrpa2b1   | 53379  |
| 94303_at    | U11274   | heterogeneous nuclear ribonucleoprotein D                                      | Hnrpd      | 11991  |
| 93250_r_at  | X67668   | high mobility group box 2                                                      | Hmgb2      | 97165  |
| 98038_at    | AF022465 | high mobility group box 3                                                      | Hmgb3      | 15354  |
| 97896_r_at  | AW125218 | histidine aminotransferase 1                                                   | Hat1       | 107435 |
| 99581_at    | U60001   | histidine triad nucleotide binding protein 1                                   | Hint1      | 15254  |
| 97318_at    | AI846197 | histidyl tRNA synthetase 2                                                     | Hars2      | 66044  |
| 94805_f_at  | M33988   | histone 1, H2ac                                                                | Hist1h2ac  | 319164 |
| 160643_at   | U31758   | histone deacetylase 2                                                          | Hdac2      | 15182  |
| 98511_at    | L17076   | hnRNP-associated with lethal yellow                                            | Raly       | 19383  |
| 160573_at   | AA645537 | holocytochrome c synthetase                                                    | Hccs       | 15159  |
| 92970_at    | L08757   | homeo box A10                                                                  | Hoxa10     | 15395  |
| 104021_at   | U20371   | homeo box A11                                                                  | Hoxa11     | 15396  |
| 103086_at   | Y00208   | homeo box A5                                                                   | Hoxa5      | 15402  |
| 92745_at    | AB005458 | homeo box A9                                                                   | Hoxa9      | 15405  |
| 93221_at    | X56561   | homeo box D8                                                                   | Hoxd8      | 15437  |
| 102323_at   | AJ002272 | huntingtin-associated protein 1                                                | Hap1       | 15114  |
| 94276_at    | AF064635 | hydroxysteroid (17-beta) dehydrogenase 12                                      | Hsd17b12   | 56348  |
| 99902_at    | AJ225123 | hyperpolarization-activated, cyclic nucleotide-gated K+ 1                      | Hcn1       | 15165  |
| 94784_at    | AI593484 | hypothetical protein D030034H08                                                | D030034H08 | 329695 |
| 160768_at   | AI461837 | hypothetical protein D030056L22                                                | D030056L22 | 225995 |
| 160107_at   | K01515   | hypoxanthine guanine phosphoribosyl transferase                                | Hprt       | 15452  |
| 93604_f_at  | AF061260 | immunoglobulin superfamily, member 4A                                          | Igsf4a     | 54725  |
| 93605_r_at  | AF061260 | immunoglobulin superfamily, member 4A                                          | Igsf4a     | 54725  |
| 96144_at    | AJ001972 | inhibitor of DNA binding 4                                                     | Idb4       | 15904  |
| 93758_at    | AA823653 | inner centromere protein                                                       | Incenp     | 16319  |
| 100578_at   | M33934   | inosine 5'-phosphate dehydrogenase 2                                           | Impdh2     | 23918  |
| 102085_at   | AF044669 | insulinoma-associated 1                                                        | Insm1      | 53626  |
| 92440_at    | U73029   | interferon regulatory factor 6                                                 | Irf6       | 54139  |
| 93823_at    | AI844864 | interleukin enhancer binding factor 2                                          | Ilf2       | 67781  |
| 94334_f_at  | L27220   | intermixin neuronal intermediate filament protein, alpha                       | Ina        | 226180 |
| 94335_r_at  | L27220   | intermixin neuronal intermediate filament protein, alpha                       | Ina        | 226180 |
| 96269_at    | AA716963 | isopentenyl-diphosphate delta isomerase                                        | Idi1       | 319554 |
| 92790_at    | D55720   | karyopherin (importin) alpha 2                                                 | Kpna2      | 16647  |
| 95622_at    | AW123907 | kelch domain containing 2                                                      | Klhd2c     | 69554  |
| 97920_at    | AA755126 | keratin complex 2, basic, gene 7                                               | Krt2-7     | 110310 |
| 93565_at    | AF055665 | kinesin 2                                                                      | Kns2       | 16593  |
| 97984_i_at  | AA709672 | kinesin 2                                                                      | Kns2       | 16593  |
| 99541_at    | AJ223293 | kinesin family member 11                                                       | Kif11      | 16551  |
| 160501_at   | Y09632   | kinesin family member 20A                                                      | Kif20a     | 19348  |
| 161856_f_at | AV059766 | kinesin family member 20A                                                      | Kif20a     | 19348  |
| 95118_r_at  | AI131895 | kinesin family member 22                                                       | Kif22      | 110033 |
| 96168_at    | AI591702 | kinesin family member 23                                                       | Kif23      | 71819  |
| 99962_at    | D12644   | kinesin family member 2A                                                       | Kif2a      | 16563  |
| 160755_at   | AA007891 | kinesin family member 2C                                                       | Kif2c      | 73804  |
| 104644_at   | D12646   | kinesin family member 4                                                        | Kif4       | 16571  |
| 100113_s_at | D50367   | kinesin-associated protein 3                                                   | Kifap3     | 16579  |
| 99577_at    | M57647   | kit ligand                                                                     | Kitl       | 17311  |
| 99956_at    | Y00864   | kit oncogene                                                                   | Kit        | 16590  |
| 160890_at   | AW214587 | lamin B receptor                                                               | Lbr        | 98386  |
| 160517_at   | M35153   | lamin B1                                                                       | Lmnb1      | 16906  |
| 101414_at   | X54098   | lamin B2                                                                       | Lmnb2      | 16907  |
| 160214_at   | AW122235 | LanC (bacterial lantibiotic synthetase component C)-like 2                     | Lanc2      | 71835  |
| 97358_at    | AI851356 | latrophilin 1                                                                  | Lphn1      | 330814 |
| 93261_at    | AJ000990 | legumain                                                                       | Lgmn       | 19141  |
| 92551_at    | U19604   | ligase I, DNA, ATP-dependent                                                   | Lig1       | 16881  |
| 104264_at   | AW122230 | LPS-responsive beige-like anchor                                               | Lrba       | 80877  |
| 101083_s_at | AF109905 | LSM2 homolog, U6 small nuclear RNA associated (S. cerevisiae)                  | Lsm2       | 27756  |
| 94455_at    | AA795062 | LSM3 homolog, U6 small nuclear RNA associated (S. cerevisiae)                  | Lsm3       | 67678  |
| 93008_at    | AW120557 | LSM4 homolog, U6 small nuclear RNA associated (S. cerevisiae)                  | Lsm4       | 50783  |
| 97907_at    | AW049564 | LSM7 homolog, U6 small nuclear RNA associated (S. cerevisiae)                  | Lsm7       | 66094  |
| 102409_at   | AW049693 | LSM8 homolog, U6 small nuclear RNA associated (S. cerevisiae)                  | Lsm8       | 76522  |
| 103487_at   | AI849993 | lymphocyte antigen 6 complex, locus H                                          | Ly6h       | 23934  |
| 98129_at    | AI852553 | M.musculus mRNA for testis-specific thymosin beta-10                           | ---        | ---    |
| 99632_at    | U83902   | MAD2 (mitotic arrest deficient, homolog)-like 1 (yeast)                        | Mad2l1     | 56150  |
| 100508_at   | AF015769 | manic fringe homolog (Drosophila)                                              | Mfng       | 17305  |
| 97203_at    | X61399   | MARCKS-like protein                                                            | Mlp        | 17357  |
| 103468_at   | D14849   | meiosis-specific nuclear structural protein 1                                  | Mns1       | 17427  |
| 92607_at    | AF017994 | mesoderm specific transcript                                                   | Mest       | 17294  |
| 102069_at   | S78454   | metal response element binding transcription factor 2                          | Mtf2       | 17765  |
| 99465_at    | AJ132922 | methyl CpG binding protein 2                                                   | Mecp2      | 17257  |
| 160833_at   | AF072243 | methyl-CpG binding domain protein 2                                            | Mbd2       | 17191  |
| 92795_at    | M72414   | microtubule-associated protein 4                                               | Mtap4      | 17758  |
| 93112_at    | D86725   | minichromosome maintenance deficient 2 mitotin (S. cerevisiae)                 | Mcm2       | 17216  |
| 100062_at   | X62154   | minichromosome maintenance deficient 3 (S. cerevisiae)                         | Mcm3       | 17215  |
| 160496_s_at | AA929330 | minichromosome maintenance deficient 3 (S. cerevisiae)                         | Mcm3       | 17215  |
| 93041_at    | D26089   | minichromosome maintenance deficient 4 homolog (S. cerevisiae)                 | Mcm4       | 17217  |
| 100156_at   | D26090   | minichromosome maintenance deficient 5, cell division cycle 46 (S. cerevisiae) | Mcm5       | 17218  |
| 93356_at    | D26091   | minichromosome maintenance deficient 7 (S. cerevisiae)                         | Mcm7       | 17220  |
| 103931_at   | AC002397 | minisatellite 10h detected by probe MMS10                                      | Msl0h      | 94049  |
| 100470_at   | L35236   | mitogen activated protein kinase 10                                            | Mapk10     | 26414  |
| 92585_at    | L02526   | mitogen activated protein kinase 1                                             | Map2k1     | 26395  |
| 160626_at   | U13262   | myelin basic protein expression factor 2, repressor                            | Myef2      | 17876  |
| 95347_at    | AF004294 | myelin transcription factor 1                                                  | Myt1       | 17932  |
| 92644_s_at  | M12848   | myeloblastosis oncogene                                                        | Myb        | 17863  |
| 100923_at   | AJ249706 | myosin X                                                                       | Myo10      | 17909  |
| 103228_at   | AF073882 | myotubularin related protein 7                                                 | Mtmr7      | 54384  |
| 96865_at    | M60474   | myristoylated alanine rich protein kinase C substrate                          | Marcks     | 17118  |
| 97201_s_at  | AA823381 | NADH dehydrogenase (ubiquinone) 1 alpha subcomplex, 5                          | Ndufa5     | 68202  |
| 101059_at   | D76440   | necdin                                                                         | Ndn        | 17984  |
| 100507_at   | Y09257   | nephroblastoma overexpressed gene                                              | Nov        | 18133  |
| 100458_at   | X61450   | N-ethylmaleimide sensitive fusion protein attachment protein beta              | Napb       | 17957  |
| 100153_at   | X15052   | neural cell adhesion molecule 1                                                | Ncam1      | 17967  |
| 160823_at   | D10712   | neural precursor cell expressed, developmentally down-regulated gene 1         | Nedd1      | 17997  |
| 94362_at    | AI843682 | neuroblastoma ras oncogene                                                     | Nras       | 18176  |
| 103491_at   | AA968123 | neuron navigator 1                                                             | Nav1       | 215690 |
| 93134_at    | U62021   | neuronal pentraxin 1                                                           | Nptx1      | 18164  |
| 160942_at   | AI843876 | neuronal pentraxin receptor                                                    | Nptxr      | 73340  |
| 97520_s_at  | X83569   | neuronatin                                                                     | Nnat       | 18111  |
| 100885_at   | AF013166 | NIMA (never in mitosis gene a)-related expressed kinase 2                      | Nek2       | 18005  |
| 93830_at    | AI851199 | non-POU-domain-containing, octamer binding protein                             | Nono       | 53610  |

|             |          |                                                                          |               |        |
|-------------|----------|--------------------------------------------------------------------------|---------------|--------|
| 98604_at    | U79774   | novel nuclear protein 1                                                  | Nnp1          | 18114  |
| 160429_at   | AW121314 | NTF2-related export protein 1                                            | Nxt1          | 56488  |
| 96174_at    | AW125692 | nuclear pore membrane protein 121                                        | Pom121        | 107939 |
| 102715_at   | X74134   | nuclear receptor subfamily 2, group F, member 1                          | Nr2f1         | 13865  |
| 98024_at    | X55316   | nuclear transcription factor-Y beta                                      | Nlyb          | 18045  |
| 161000_l_at | AA275196 | nucleolar and spindle associated protein 1                               | Nusap1        | 108907 |
| 92569_f_at  | AF053232 | nucleolar protein 5                                                      | Nof5          | 55899  |
| 95109_at    | AW121447 | nucleolar protein 5A                                                     | Nol5a         | 67134  |
| 102412_at   | AI226158 | nucleoporin 107                                                          | Nup107        | 103468 |
| 93046_at    | AW045233 | nucleoporin 50                                                           | Nup50         | 18141  |
| 160167_at   | AW121948 | nucleoporin 62                                                           | Nup62         | 18226  |
| 98146_at    | AW120775 | nucleoporin 88                                                           | Nup88         | 19069  |
| 98586_at    | AW107230 | nucleosome assembly protein 1-like 1                                     | Nap1l1        | 53605  |
| 98587_at    | X61449   | nucleosome assembly protein 1-like 1                                     | Nap1l1        | 53605  |
| 98313_at    | AB025413 | odd Oz/ten-m homolog 4 (Drosophila)                                      | Odz4          | 23966  |
| 98314_g_at  | AB025413 | odd Oz/ten-m homolog 4 (Drosophila)                                      | Odz4          | 23966  |
| 95712_at    | AW045261 | origin recognition complex, subunit 6-like (S. cerevisiae)               | Orc6l         | 56452  |
| 98432_at    | X99384   | paladin                                                                  | Pald          | 27355  |
| 160634_at   | AI848201 | Park2 co-regulated                                                       | Pacrg         | 69310  |
| 101451_at   | AF038939 | paternally expressed 3                                                   | Peg3          | 18616  |
| 96765_at    | AW120874 | paternally expressed 3                                                   | Peg3          | 18616  |
| 97853_at    | AW047331 | PC4 and SFRS1 interacting protein 1                                      | Pspj1         | 101739 |
| 97445_at    | AW122022 | peptidylprolyl isomerase D (cyclophilin D)                               | Ppid          | 67738  |
| 99662_at    | AI194767 | pericentrin 2                                                            | Pcnt2         | 18541  |
| 99663_g_at  | AI194767 | pericentrin 2                                                            | Pcnt2         | 18541  |
| 96140_at    | AF039021 | pericentriolar material 1                                                | Pcm1          | 18536  |
| 93495_at    | U96746   | peroxiredoxin 4                                                          | Prdx4         | 53381  |
| 93421_at    | AF033655 | PFTAIRES protein kinase 1                                                | Pftk1         | 18647  |
| 100489_at   | U68171   | phosphodiesterase 7A                                                     | Pde7a         | 18583  |
| 97833_at    | AI853802 | phosphofructokinase, platelet                                            | Pfcp          | 56421  |
| 97834_g_at  | AI853802 | phosphofructokinase, platelet                                            | Pfcp          | 56421  |
| 92474_at    | AF083497 | phospholipase D1                                                         | Pld1          | 18805  |
| 95507_at    | AB025048 | phosphoribosyl pyrophosphate synthetase 1                                | Prps1         | 19139  |
| 100066_at   | U20892   | phosphoribosylglycinamide formyltransferase                              | Gart          | 14450  |
| 97753_at    | Y19186   | piccolo (presynaptic cytomatrix protein)                                 | Pclo          | 26875  |
| 101844_at   | U94700   | pipecolic acid oxidase                                                   | Pipox         | 19193  |
| 101027_s_at | AF069051 | pituitary tumor-transforming 1                                           | Pttg1         | 30939  |
| 94445_at    | AW125273 | plastin 3 (T-isoform)                                                    | Pls3          | 102866 |
| 100576_at   | U57746   | platelet-activating factor acetylhydrolase, isoform 1b, alpha1 subunit   | Pafah1b3      | 18476  |
| 160187_at   | AI846932 | platelet-activating factor acetylhydrolase, isoform 1b, alpha2 subunit   | Pafah1b2      | 18475  |
| 95404_at    | AW123453 | platelet-activating factor acetylhydrolase, isoform 1b, alpha2 subunit   | Pafah1b2      | 18475  |
| 95368_at    | D86949   | plexin A2                                                                | Pbxna2        | 18845  |
| 101350_g_at | U73170   | polo-like kinase 1 (Drosophila)                                          | Plk1          | 18817  |
| 93099_f_at  | U01063   | polo-like kinase 1 (Drosophila)                                          | Plk1          | 18817  |
| 98996_at    | L29480   | polo-like kinase 4 (Drosophila)                                          | Plk4          | 20873  |
| 100992_at   | U63386   | polyhomeotic-like 1 (Drosophila)                                         | Phc1          | 13619  |
| 103207_at   | D13543   | polymerase (DNA directed), alpha 1                                       | Pola1         | 18968  |
| 103057_at   | AF024570 | polymerase (DNA directed), delta 1, catalytic subunit                    | Pold1         | 18971  |
| 95121_at    | AW060791 | polymerase (DNA-directed), epsilon 4 (p12 subunit)                       | Pole4         | 66979  |
| 104454_at   | U28724   | postmeiotic segregation increased 2 (S. cerevisiae)                      | Pms2          | 18861  |
| 102892_at   | U65592   | potassium voltage-gated channel, shaker-related subfamily, beta member 2 | Kcnab2        | 16498  |
| 92904_at    | U08185   | PR domain containing 1, with ZNF domain                                  | Prdm1         | 12142  |
| 100606_at   | M18070   | prion protein                                                            | Prnp          | 19122  |
| 93567_at    | AW122536 | profilin 2                                                               | Pfn2          | 18645  |
| 101065_at   | X57800   | proliferating cell nuclear antigen                                       | Pcna          | 18538  |
| 100125_at   | U43918   | proliferation-associated 2G4                                             | Pa2g4         | 18813  |
| 94694_at    | M69196   | proprotein convertase subtilisin/kexin type 1                            | Pcsk1         | 18548  |
| 102614_at   | AF061576 | prospero-related homeobox 1                                              | Prox1         | 19130  |
| 102858_at   | L02241   | protein kinase inhibitor beta, cAMP dependent, testis specific           | Pkib          | 18768  |
| 98004_at    | M63554   | protein kinase inhibitor, alpha                                          | Pkia          | 18767  |
| 98005_at    | AW125442 | protein kinase inhibitor, alpha                                          | Pkia          | 18767  |
| 92549_at    | U97170   | protein kinase inhibitor, gamma                                          | Pkig          | 18769  |
| 96852_at    | AW122197 | protein kinase, cAMP dependent regulatory, type I, alpha                 | Pkar1a        | 19084  |
| 92879_at    | U42383   | protein phosphatase 1G (formerly 2C), magnesium-dependent, gamma isoform | Ppm1g         | 14208  |
| 95032_at    | AA856349 | protein regulator of cytokinesis 1                                       | Prc1          | 23406  |
| 94020_at    | Y17808   | protein tyrosine kinase 9-like (A6-related protein)                      | Ptk9l         | 23999  |
| 160862_at   | AF035645 | protein tyrosine phosphatase 4a3                                         | Ptp4a3        | 19245  |
| 160480_at   | X82288   | protein tyrosine phosphatase, receptor type, S                           | Ptprs         | 19280  |
| 160610_at   | D86916   | protocadherin alpha 4                                                    | Pcdha4        | 12936  |
| 94449_at    | AI854522 | protocadherin gamma subfamily C, 3                                       | Pcdhgc3       | 93706  |
| 101926_at   | L41495   | proviral integration site 2                                              | Pim2          | 18715  |
| 94406_at    | AJ242864 | putative homeodomain transcription factor 1                              | Phtf1         | 18685  |
| 104491_at   | AI509330 | putative homeodomain transcription factor 2                              | Phtf2         | 68770  |
| 162032_f_at | AV368209 | pyruvate kinase, muscle                                                  | Pkm2          | 18746  |
| 95539_at    | AA798971 | RAB3A interacting protein                                                | Rab3ip        | 216363 |
| 94953_at    | AW122347 | Rac GTPase-activating protein 1                                          | Racgap1       | 26934  |
| 94768_at    | D37790   | RAD21 homolog (S. pombe)                                                 | Rad21         | 19357  |
| 93676_at    | U93583   | RAD51 associated protein 1                                               | Rad51ap1      | 19362  |
| 104527_at   | D13803   | RAD51 homolog (S. cerevisiae)                                            | Rad51         | 19361  |
| 98573_r_at  | X56045   | RAN binding protein 1                                                    | Ranbp1        | 19385  |
| 98602_at    | U08110   | RAN GTPase activating protein 1                                          | Rangap1       | 19387  |
| 101254_at   | L32751   | RAN, member RAS oncogene family                                          | Ran           | 19384  |
| 102821_s_at | L32752   | RAN, member RAS oncogene family                                          | Ran           | 19384  |
| 92659_at    | AF115480 | Rap guanine nucleotide exchange factor (GEF) 4                           | Rapgef4       | 56508  |
| 160822_at   | AI853638 | Rap1, GTPase-activating protein 1                                        | Rap1ga1       | 110351 |
| 92610_at    | M21332   | RD RNA-binding protein                                                   | Rdbp          | 27632  |
| 93020_at    | AF051347 | reduced expression 3                                                     | Rex3          | 19716  |
| 93645_at    | AF011360 | regulator of G protein signaling 7                                       | Rgs7          | 24012  |
| 160759_at   | AA597246 | replication factor C (activator 1) 2                                     | Rfc2          | 19718  |
| 160072_at   | AV026570 | replication factor C (activator 1) 3                                     | Rfc3          | 69263  |
| 103418_at   | AW122092 | replication factor C (activator 1) 4                                     | Rfc4          | 106344 |
| 95612_at    | AA667128 | replication factor C (activator 1) 5                                     | Rfc5          | 72151  |
| 95427_at    | AI843650 | replication protein A1                                                   | Rpa1          | 68275  |
| 160324_at   | AI848299 | replication protein A3                                                   | Rpa3          | 68240  |
| 101828_at   | X67812   | ret proto-oncogene                                                       | Ret           | 19713  |
| 97948_at    | M26391   | retinoblastoma 1                                                         | Rb1           | 19645  |
| 104476_at   | U27177   | retinoblastoma-like 1 (p107)                                             | Rbl1          | 19650  |
| 94024_at    | AA671429 | retroviral integration site 2                                            | Ris2          | 67177  |
| 160071_at   | U95123   | ribonuclease P/MRP 30kDa subunit (human)                                 | Rpp30         | 54364  |
| 100612_at   | K02927   | ribonucleotide reductase M1                                              | Rrm1          | 20133  |
| 102001_at   | M14223   | ribonucleotide reductase M2                                              | Rrm2          | 20135  |
| 96955_at    | AI841320 | RIKEN cDNA 0610006O14 gene                                               | 0610006O14Rik | 76252  |
| 95677_at    | AA881621 | RIKEN cDNA 0610009C03 gene                                               | 0610009C03Rik | 66585  |
| 160156_at   | AA981015 | RIKEN cDNA 0910001A06 gene                                               | 0910001A06Rik | 223601 |
| 93805_at    | AW121164 | RIKEN cDNA 1110003H09 gene                                               | 1110003H09Rik | 68475  |
| 94340_at    | AW124224 | RIKEN cDNA 1110004L07 gene                                               | 1110004L07Rik | 76284  |
| 95760_at    | AI848730 | RIKEN cDNA 1110011K10 gene                                               | 1110011K10Rik | 66126  |

|             |          |                                                              |               |        |
|-------------|----------|--------------------------------------------------------------|---------------|--------|
| 160228_at   | AI838249 | RIKEN cDNA 1110019C08 gene                                   | 1110019C08Rik | 224250 |
| 101440_at   | AW047074 | RIKEN cDNA 1110033L15 gene                                   | 1110033L15Rik | 73752  |
| 160723_at   | AW124848 | RIKEN cDNA 1500001M20 gene                                   | 1500001M20Rik | 68971  |
| 160787_at   | AW124900 | RIKEN cDNA 1500010J02 gene                                   | 1500010J02Rik | 68964  |
| 98953_at    | AW048032 | RIKEN cDNA 1500010M16 gene                                   | 1500010M16Rik | 68969  |
| 160749_at   | AI846812 | RIKEN cDNA 1500011H22 gene                                   | 1500011H22Rik | 68948  |
| 98938_at    | AI852184 | RIKEN cDNA 1500026D16 gene                                   | 1500026D16Rik | 68209  |
| 93155_at    | AI847069 | RIKEN cDNA 1500032A09 gene                                   | 1500032A09Rik | 228564 |
| 96900_at    | AW125480 | RIKEN cDNA 1620401E04 gene                                   | 1620401E04Rik | 103172 |
| 160975_at   | AI504338 | RIKEN cDNA 1700024K14 gene                                   | 1700024K14Rik | 78785  |
| 160676_at   | AI839212 | RIKEN cDNA 1810012N18 gene                                   | 1810012N18Rik | 69110  |
| 97371_at    | AW120599 | RIKEN cDNA 2310022K01 gene                                   | 2310022K01Rik | 71909  |
| 99149_at    | AI851230 | RIKEN cDNA 2310035M22 gene                                   | 2310035M22Rik | 66949  |
| 96871_at    | AI844355 | RIKEN cDNA 2310042G06 gene                                   | 2310042G06Rik | 66390  |
| 160659_at   | AI853129 | RIKEN cDNA 2310057G13 gene                                   | 2310057G13Rik | 69692  |
| 93986_at    | AA939576 | RIKEN cDNA 2410003A14 gene                                   | 2410003A14Rik | 67872  |
| 93021_at    | AA790008 | RIKEN cDNA 2410004M13 gene                                   | LOC406217     | 406217 |
| 96293_at    | AI842600 | RIKEN cDNA 2410015N17 gene                                   | 2410015N17Rik | 66422  |
| 96294_s_at  | AI854235 | RIKEN cDNA 2410015N17 gene                                   | 2410015N17Rik | 66422  |
| 96779_f_at  | AI846315 | RIKEN cDNA 2410022L05 gene                                   | 2410022L05Rik | 66423  |
| 96885_at    | AW122271 | RIKEN cDNA 2510015F01 gene                                   | 2510015F01Rik | 70021  |
| 100057_at   | AI838320 | RIKEN cDNA 2510027N19 gene                                   | 2510027N19Rik | 67711  |
| 103529_at   | AW125505 | RIKEN cDNA 2600017J23 gene                                   | 2600017J23Rik | 66443  |
| 160445_at   | AI844714 | RIKEN cDNA 2610005H11 gene                                   | 2610005H11Rik | 72114  |
| 160758_at   | AW124855 | RIKEN cDNA 2610007A16 gene                                   | 2610007A16Rik | 72124  |
| 93217_at    | AW049642 | RIKEN cDNA 2610017J04 gene                                   | 2610017J04Rik | 75407  |
| 160699_at   | AI877184 | RIKEN cDNA 2610036L13 gene                                   | 2610036L13Rik | 67849  |
| 104045_at   | AW122372 | RIKEN cDNA 2610102M01 gene                                   | 2610102M01Rik | 72480  |
| 95927_f_at  | AA222883 | RIKEN cDNA 2610201A13 gene                                   | 2610201A13Rik | 70434  |
| 94893_at    | AI840411 | RIKEN cDNA 2610301B20 gene                                   | 2610301B20Rik | 67157  |
| 103069_at   | AI853682 | RIKEN cDNA 2700022J23 gene                                   | 2700022J23Rik | 72568  |
| 94360_at    | AA672650 | RIKEN cDNA 2700029M09 gene                                   | 2700029M09Rik | 72612  |
| 100955_at   | AA989957 | RIKEN cDNA 2700084L22 gene                                   | 2700084L22Rik | 67196  |
| 96016_at    | AW045665 | RIKEN cDNA 2700094K13 gene                                   | 2700094K13Rik | 72657  |
| 93441_at    | AI595322 | RIKEN cDNA 2700099C18 gene                                   | 2700099C18Rik | 77022  |
| 97374_at    | AI840458 | RIKEN cDNA 2810025M15 gene                                   | 2810025M15Rik | 69953  |
| 104423_at   | AW212532 | RIKEN cDNA 2810047L02 gene                                   | 2810047L02Rik | 76843  |
| 95153_at    | AI845988 | RIKEN cDNA 2810404F18 gene                                   | 2810404F18Rik | 72729  |
| 100116_at   | AI122538 | RIKEN cDNA 2810417H13 gene                                   | 2810417H13Rik | 68026  |
| 103071_at   | AI843655 | RIKEN cDNA 2810429C13 gene                                   | 2810429C13Rik | 235559 |
| 95440_at    | AI846093 | RIKEN cDNA 2810432L12 gene                                   | 2810432L12Rik | 67063  |
| 103664_r_at | AA959648 | RIKEN cDNA 2810452K22 gene                                   | 2810452K22Rik | 67236  |
| 95759_at    | AW123746 | RIKEN cDNA 2900092E17 gene                                   | 2900092E17Rik | 67278  |
| 160204_at   | AI838470 | RIKEN cDNA 3110013H01 gene                                   | 3110013H01Rik | 73139  |
| 103338_at   | AW120504 | RIKEN cDNA 3110039K10 gene                                   | 3110039K10Rik | 67287  |
| 100464_at   | AI840585 | RIKEN cDNA 3110043O21 gene                                   | 3110043O21Rik | 73205  |
| 97412_at    | AI843157 | RIKEN cDNA 3300001G02 gene                                   | 3300001G02Rik | 78372  |
| 103203_f_at | AW259499 | RIKEN cDNA 4432406C08 gene                                   | 4432406C08Rik | 108961 |
| 103204_r_at | AW259499 | RIKEN cDNA 4432406C08 gene                                   | 4432406C08Rik | 108961 |
| 99645_at    | AW048484 | RIKEN cDNA 4921506J03 gene                                   | 4921506J03Rik | 382423 |
| 94243_at    | AI849588 | RIKEN cDNA 4930432B04 gene                                   | 4930432B04Rik | 75786  |
| 160191_at   | AW122058 | RIKEN cDNA 4931433E08 gene                                   | 4931433E08Rik | 70999  |
| 102966_at   | AA934166 | RIKEN cDNA 4932442K20 gene                                   | 4932442K20Rik | 231464 |
| 98047_at    | AI851583 | RIKEN cDNA 5730410I19 gene                                   | 5730410I19Rik | 66622  |
| 93742_at    | AW045476 | RIKEN cDNA 5730449L18 gene                                   | 5730449L18Rik | 66637  |
| 96634_at    | AI850090 | RIKEN cDNA 5730469M10 gene                                   | 5730469M10Rik | 70564  |
| 104586_at   | AI842878 | RIKEN cDNA 5730507C05 gene                                   | 5730507C05Rik | 70633  |
| 103584_at   | AW124334 | RIKEN cDNA 5830471E12 gene                                   | 5830471E12Rik | 77208  |
| 93174_at    | AI593640 | RIKEN cDNA 6030411F23 gene                                   | 6030411F23Rik | 102657 |
| 103796_at   | AF064071 | RIKEN cDNA 6230400I06 gene                                   | 6230400I06Rik | 76129  |
| 100290_f_at | AI197337 | RIKEN cDNA 6230416J20 gene                                   | 6230416J20Rik | 230376 |
| 96208_at    | AW123514 | RIKEN cDNA 6430596G11 gene                                   | 6430596G11Rik | 232906 |
| 160682_at   | AI851770 | RIKEN cDNA 6430706D22 gene                                   | 6430706D22Rik | 381280 |
| 94211_at    | AA959180 | RIKEN cDNA 6720460F02 gene                                   | 6720460F02Rik | 109212 |
| 103481_at   | AA623379 | RIKEN cDNA 8430426H19 gene                                   | 8430426H19Rik | 71508  |
| 97448_at    | AI845165 | RIKEN cDNA 9030221M09 gene                                   | 9030221M09Rik | 320951 |
| 103435_at   | AW045910 | RIKEN cDNA 9430080K19 gene                                   | 9430080K19Rik | 68120  |
| 160905_s_at | AI840713 | RIKEN cDNA A030009H04 gene                                   | A030009H04Rik | 80515  |
| 95288_i_at  | AA189811 | RIKEN cDNA A430106J12 gene                                   | A430106J12Rik | 108686 |
| 95753_at    | AW213883 | RIKEN cDNA A730011O11 gene                                   | A730011O11Rik | 215387 |
| 103303_at   | AA798246 | RIKEN cDNA A730019I05 gene                                   | A730019I05Rik | 320790 |
| 160904_at   | AI841484 | RIKEN cDNA B230317C12 gene                                   | B230317C12Rik | 56279  |
| 97105_at    | AI642677 | RIKEN cDNA C230027N18 gene                                   | C230027N18Rik | 330940 |
| 160973_at   | AA590345 | RIKEN cDNA C330027C09 gene                                   | C330027C09Rik | 224171 |
| 100410_at   | AW122781 | RIKEN cDNA C330027G06 gene                                   | C330027G06Rik | 68280  |
| 103257_at   | AA690483 | RIKEN cDNA C730036B01 gene                                   | C730036B01Rik | 99887  |
| 95397_at    | AI852661 | RIKEN cDNA D430019H16 gene                                   | D430019H16Rik | 268595 |
| 96625_at    | AW123132 | RIKEN cDNA D630024B06 gene                                   | D630024B06Rik | 218973 |
| 99524_at    | AF004666 | RIKEN cDNA D930008O12 gene                                   | D930008O12Rik | 319418 |
| 97365_at    | AI848032 | RIKEN cDNA E130012P22 gene                                   | E130012P22Rik | 235431 |
| 103444_at   | AI272489 | RIKEN cDNA E130315B21 gene                                   | E130315B21Rik | 327762 |
| 101939_at   | AI849344 | ring finger protein 141                                      | Rnf141        | 67150  |
| 95124_i_at  | AW122337 | ring-box 1                                                   | Rbx1          | 56438  |
| 95125_f_at  | AW122337 | ring-box 1                                                   | Rbx1          | 56438  |
| 160633_at   | U89876   | RNA and export factor binding protein 1                      | Relfbp1       | 21681  |
| 160192_at   | AF031568 | RNA binding motif protein, X chromosome retrogene            | Rbmxrt        | 19656  |
| 93898_at    | AB024921 | sarcoglycan, beta (dystrophin-associated glycoprotein)       | Sgcb          | 24051  |
| 104564_at   | U02982   | secretogranin III                                            | Scg3          | 20255  |
| 162237_f_at | AV328553 | secretogranin III                                            | Scg3          | 20255  |
| 100131_at   | X15830   | secretory granule neuroendocrine protein 1, 7B2 protein      | Sgne1         | 20394  |
| 92757_at    | D29763   | seizure related gene 6                                       | Sez6          | 20370  |
| 99494_at    | AJ001700 | serine (or cysteine) proteinase inhibitor, clade I, member 1 | Serpini1      | 20713  |
| 98042_at    | AW049787 | serine carboxypeptidase 1                                    | Scpep1        | 74617  |
| 92639_at    | U80932   | serine/threonine kinase 6                                    | Stk6          | 20878  |
| 95467_at    | AW120746 | short coiled-coil protein                                    | Scoc          | 56367  |
| 99042_s_at  | U66918   | short stature homeobox 2                                     | Shox2         | 20429  |
| 102208_at   | AI153959 | sialyltransferase 10 (alpha-2,3-sialyltransferase VI)        | Siat10        | 54613  |
| 102318_at   | X86000   | sialyltransferase 8 (alpha-2, 8-sialyltransferase) D         | Siat8d        | 20452  |
| 101214_f_at | M32599   | similar to glyceraldehyde-3-phosphate dehydrogenase          | LOC14433      | 14433  |
| 92722_f_at  | X80339   | sine oculis-related homeobox 1 homolog (Drosophila)          | Six1          | 20471  |
| 92999_at    | D50416   | sine oculis-related homeobox 4 homolog (Drosophila)          | Six4          | 20474  |
| 93000_g_at  | D50416   | sine oculis-related homeobox 4 homolog (Drosophila)          | Six4          | 20474  |
| 93001_at    | D50418   | sine oculis-related homeobox 4 homolog (Drosophila)          | Six4          | 20474  |
| 92265_f_at  | AF042139 | Sjogren syndrome antigen A2                                  | Ssa2          | 20822  |
| 100577_at   | M58558   | small nuclear ribonucleoprotein D1                           | Snrpd1        | 20641  |
| 97200_f_at  | X65704   | small nuclear ribonucleoprotein E                            | Snrpe         | 20643  |
| 93999_at    | AW060597 | small nuclear ribonucleoprotein polypeptide G                | Snrpg         | 68011  |

|             |          |                                                                                                                  |          |        |
|-------------|----------|------------------------------------------------------------------------------------------------------------------|----------|--------|
| 97421_at    | U42385   | SMC2 structural maintenance of chromosomes 2-like 1 (yeast)                                                      | Smc2l1   | 14211  |
| 101906_at   | AA032310 | SMC4 structural maintenance of chromosomes 4-like 1 (yeast)                                                      | Smc4l1   | 70099  |
| 100887_at   | A1838562 | SMC6 structural maintenance of chromosomes 6-like 1 (yeast)                                                      | Smc6l1   | 67241  |
| 103065_at   | M73696   | solute carrier family 20, member 1                                                                               | Slc20a1  | 20515  |
| 96845_at    | A1849577 | solute carrier family 30 (zinc transporter), member 9                                                            | Slc30a9  | 109108 |
| 103459_at   | AW124544 | solute carrier family 39 (metal ion transporter), member 6                                                       | Slc39a6  | 106957 |
| 92987_at    | M28383   | solute carrier family 4 (anion exchanger), member 3                                                              | Slc4a3   | 20536  |
| 98400_at    | AA896295 | SoxLZ/Sox6 leucine zipper binding protein in testis                                                              | Solt     | 60411  |
| 103585_at   | A1851408 | spastic paraplegia 4 homolog (human)                                                                             | Spg4     | 50850  |
| 101520_at   | AF032967 | spermatogenesis associated 6                                                                                     | Spata6   | 67946  |
| 104069_at   | A1852737 | spermatogenesis associated, serine-rich 2                                                                        | Spats2   | 72572  |
| 99620_at    | AW060546 | splicing factor proline/glutamine rich (polypyrimidine tract binding protein associated)                         | Sfpq     | 71514  |
| 101004_f_at | X91656   | splicing factor, arginine/serine-rich 3 (SRP20)                                                                  | Sfrs3    | 20383  |
| 94322_at    | D42048   | squalene epoxidase                                                                                               | Sqle     | 20775  |
| 97340_at    | A1839599 | squamous cell carcinoma antigen recognized by T-cells 3                                                          | Sart3    | 53890  |
| 102012_at   | AB014485 | src family associated phosphoprotein 2                                                                           | Scap2    | 54353  |
| 101631_at   | AF009414 | SRY-box containing gene 11                                                                                       | Sox11    | 20666  |
| 93669_f_at  | AW107922 | SRY-box containing gene 11                                                                                       | Sox11    | 20666  |
| 100009_r_at | X94127   | SRY-box containing gene 2                                                                                        | Sox2     | 20674  |
| 101430_at   | AW124153 | SRY-box containing gene 4                                                                                        | Sox4     | 20677  |
| 97909_at    | A1838080 | stathmin 1                                                                                                       | Stmn1    | 16765  |
| 160170_at   | AF069708 | stathmin-like 3                                                                                                  | Stmn3    | 20262  |
| 160471_at   | U75680   | stem-loop binding protein                                                                                        | Silpb    | 20492  |
| 160388_at   | A1848668 | sterol-C4-methyl oxidase-like                                                                                    | Sc4mol   | 66234  |
| 95069_at    | AA940430 | structure specific recognition protein 1                                                                         | Ssrp1    | 20833  |
| 101406_at   | AF026072 | sulfotransferase family, cytosolic, 2B, member 1                                                                 | Sult2b1  | 54200  |
| 99475_at    | U88327   | suppressor of cytokine signaling 2                                                                               | Socs2    | 216233 |
| 162206_f_at | AV374868 | suppressor of cytokine signaling 3                                                                               | Socs3    | 12702  |
| 97394_at    | AA794509 | SWI/SNF related, matrix associated, actin dependent regulator of chromatin, subfamily a, member 5                | Smarca5  | 93762  |
| 96050_at    | AJ011740 | SWI/SNF related, matrix associated, actin dependent regulator of chromatin, subfamily b, member 1                | Smarca1b | 20587  |
| 102062_at   | U85614   | SWI/SNF related, matrix associated, actin dependent regulator of chromatin, subfamily c, member 1                | Smarca1c | 20588  |
| 98991_at    | X69942   | SWI/SNF-related, matrix-associated actin-dependent regulator of chromatin, subfamily a, containing DEAD/H box 1' | Smarca1d | 13990  |
| 100047_at   | M22012   | synaptosomal-associated protein 25                                                                               | Snap25   | 20614  |
| 100455_at   | M83985   | synaptosomal-associated protein 91                                                                               | Snap91   | 20616  |
| 93005_at    | D37792   | synaptotagmin 1                                                                                                  | Syt1     | 20979  |
| 97983_s_at  | D45903   | syntaxin binding protein 1                                                                                       | Sxbp1    | 20910  |
| 93273_f_at  | AF044672 | synuclein, alpha                                                                                                 | Snc      | 20617  |
| 103074_f_at | A1842969 | TAF9 RNA polymerase II, TATA box binding protein (TBP)-associated factor                                         | Taf9     | 108143 |
| 93918_at    | AA673500 | TAF9 RNA polymerase II, TATA box binding protein (TBP)-associated factor                                         | Taf9     | 108143 |
| 98555_at    | AB008516 | tetratricopeptide repeat domain 3                                                                                | Tic3     | 22129  |
| 94015_at    | AW060447 | TH1-like homolog (Drosophila)                                                                                    | Th1l     | 57314  |
| 99985_at    | AB027565 | thioredoxin reductase 1                                                                                          | Txnrd1   | 50493  |
| 93236_s_at  | M13352   | thymidylate synthase                                                                                             | Tyms     | 22171  |
| 93237_s_at  | AU044050 | thymidylate synthase, pseudogene                                                                                 | Tyms-ps  | 22172  |
| 101540_at   | AF069519 | thymine DNA glycosylase                                                                                          | Tdg      | 21665  |
| 92782_at    | U39074   | thymopoietin                                                                                                     | Tmpo     | 21917  |
| 103036_at   | M38700   | thyroid autoantigen                                                                                              | G22p1    | 14375  |
| 100953_at   | AB015598 | timeless homolog (Drosophila)                                                                                    | Timeless | 18553  |
| 95497_at    | A1843880 | timeless interacting protein                                                                                     | Tipin    | 66131  |
| 98850_at    | U34042   | tollid-like                                                                                                      | Tll      | 21892  |
| 99578_at    | U01915   | topoisomerase (DNA) II alpha                                                                                     | Top2a    | 21973  |
| 93538_at    | AW228036 | Traf and Trnf receptor associated protein                                                                        | Ttrap    | 56196  |
| 103328_at   | U59864   | TRAF family member-associated NF-kappa B activator                                                               | Tank     | 21353  |
| 96579_at    | AA267568 | Transcribed sequences                                                                                            | ---      | ---    |
| 94008_at    | AW045358 | transcription elongation factor B (SIII), polypeptide 1                                                          | Tceb1    | 67923  |
| 101008_at   | AB023485 | transcription elongation regulator 1 (CA150)                                                                     | Tcoer1   | 56070  |
| 102354_at   | AI049398 | transcription factor 19                                                                                          | Tcf19    | 106795 |
| 160483_at   | U16322   | transcription factor 4                                                                                           | Tcf4     | 21413  |
| 101958_f_at | X72310   | transcription factor Dp 1                                                                                        | Tfdp1    | 21781  |
| 101959_r_at | X72310   | transcription factor Dp 1                                                                                        | Tfdp1    | 21781  |
| 104154_at   | AB021961 | transformation related protein 53                                                                                | Trp53    | 22059  |
| 103599_at   | M20824   | transformed mouse 3T3 cell double minute 1                                                                       | Mdm1     | 17245  |
| 97238_at    | AW209238 | transforming, acidic coiled-coil containing protein 3                                                            | Tacc3    | 21335  |
| 94739_at    | U73625   | transient receptor potential cation channel, subfamily C, member 1                                               | Trpc1    | 22063  |
| 94100_s_at  | AF011543 | transient receptor potential cation channel, subfamily C, member 4                                               | Trpc4    | 22066  |
| 93326_at    | D26483   | transmembrane 4 superfamily member 2                                                                             | Tm4sf2   | 21912  |
| 103017_at   | AI060729 | transmembrane 7 superfamily member 1                                                                             | Tm7sf1   | 83924  |
| 103092_at   | AW124316 | tripartite motif protein 37                                                                                      | Trim37   | 68729  |
| 92270_at    | A1847616 | trophinin                                                                                                        | Tro      | 56191  |
| 95542_at    | A1835858 | tropomyosin 4                                                                                                    | Tpm4     | 326618 |
| 103201_at   | M86377   | Ttk protein kinase                                                                                               | Ttk      | 22137  |
| 100342_i_at | M28729   | tubulin, alpha 1                                                                                                 | Tuba1    | 22142  |
| 100343_f_at | M28729   | tubulin, alpha 1                                                                                                 | Tuba1    | 22142  |
| 101419_at   | M28730   | tubulin, beta 4                                                                                                  | Tubb4    | 22153  |
| 94788_f_at  | X04663   | tubulin, beta 5                                                                                                  | Tubb5    | 22154  |
| 94789_r_at  | X04663   | tubulin, beta 5                                                                                                  | Tubb5    | 22154  |
| 99924_at    | AW121845 | tubulin, gamma 1                                                                                                 | Tubg1    | 103733 |
| 104067_at   | A1648999 | tubulin, gamma complex associated protein 3                                                                      | Tubgcp3  | 259279 |
| 102032_at   | AW060819 | twisted gastrulation homolog 1 (Drosophila)                                                                      | Twsg1    | 65960  |
| 97486_at    | AA693246 | U2 small nuclear ribonucleoprotein auxiliary factor (U2AF) 1                                                     | U2af1    | 108121 |
| 100512_at   | A1838853 | ubiquitin carboxyl-terminal esterase L5                                                                          | Uch5     | 56207  |
| 96244_at    | AB025313 | ubiquitin carboxyl-terminal hydrolase L1                                                                         | Uchl1    | 22223  |
| 160234_at   | A1848382 | ubiquitin specific protease 1                                                                                    | Usp1     | 230484 |
| 160247_at   | AW060527 | ubiquitin-conjugating enzyme E2 variant 2                                                                        | Ube2v2   | 70620  |
| 94274_at    | A1837415 | ubiquitin-conjugating enzyme E2S                                                                                 | Ube2s    | 77891  |
| 95703_at    | AB024303 | ubiquitin-like 1 (sentrin) activating enzyme E1A                                                                 | Uble1a   | 56459  |
| 96701_at    | U35833   | ubiquitin-like 1 (sentrin) activating enzyme E1B                                                                 | Uble1b   | 50995  |
| 99564_at    | D87908   | ubiquitin-like, containing PHD and RING finger domains, 1                                                        | Uhrf1    | 18140  |
| 98960_s_at  | AF029792 | UDP-Gal:betaGlcNAc beta 1,3-galactosyltransferase, polypeptide 3                                                 | B3gal3   | 26879  |
| 98961_f_at  | A1841494 | UDP-Gal:betaGlcNAc beta 1,3-galactosyltransferase, polypeptide 3                                                 | B3gal3   | 26879  |
| 102936_at   | AW125314 | UDP-Gal:betaGlcNAc beta 1,4-galactosyltransferase, polypeptide 6                                                 | B4gal6   | 56386  |
| 102792_at   | U55040   | uracil-DNA glycosylase                                                                                           | Ung      | 22256  |
| 162166_f_at | AV360742 | vesicular membrane protein p24                                                                                   | Vmp      | 22360  |
| 92892_at    | D83206   | vesicular membrane protein p24                                                                                   | Vmp      | 22360  |
| 103499_at   | A1843063 | Von Willebrand factor homolog                                                                                    | Vwf      | 22371  |
| 94998_at    | A1838452 | v-ral simian leukemia viral oncogene homolog A (ras related)                                                     | Rala     | 56044  |
| 98946_at    | AF033186 | WD repeat and SOCS box-containing 1                                                                              | Wsb1     | 78889  |
| 95643_at    | AW050287 | WD repeat domain 6                                                                                               | Wdr6     | 83669  |
| 103415_at   | A1840925 | Werner helicase interacting protein 1                                                                            | Wrmip1   | 78903  |
| 98617_at    | AF071186 | WW domain binding protein 11                                                                                     | Wbp11    | 60321  |
| 101883_s_at | L22977   | X-linked lymphocyte-regulated 3a                                                                                 | Xlr3a    | 22445  |
| 95318_at    | AF045565 | zinc finger protein 105                                                                                          | Zfp105   | 22646  |
| 160321_at   | AF062071 | zinc finger protein 216                                                                                          | Zfp216   | 22682  |
| 102411_at   | M32057   | zinc finger protein 239                                                                                          | Zfp239   | 22685  |
| 97857_at    | AW047762 | zinc finger, DHHC domain containing 3                                                                            | Zdhhc3   | 69035  |
| 104741_at   | A1843023 | zinc finger, DHHC domain containing 9                                                                            | Zdhhc9   | 208884 |
| 99574_at    | A1850887 | zinc finger/RING finger 2                                                                                        | Znrf2    | 387524 |
