# Supplementary material
Source: PubMed Central journal article supplement (PMC1174979)
Supplement: pnas_0500756102_13.pdf [file pnas_0500756102_13.pdf]

Table 9. Probesets (545) representing 488 transcripts identified by SAM that are enriched  $\geq 2$ -fold in poor-prognosis NE tumors compared to good-prognosis NE tumors

| Probeset ID | GenBank/TIGR ID | Gene Name                                                                                            | Gene Symbol  | LocusLink ID | SAM Score | SAM Fold Change |
|-------------|-----------------|------------------------------------------------------------------------------------------------------|--------------|--------------|-----------|-----------------|
| 37625_at    | U52682          | interferon regulatory factor 4                                                                       | IRF4         | 3662         | 5.865     | 196.2           |
| 38850_at    | M11119          | Human endogenous retrovirus envelope region mRNA (PL1)                                               | ---          | ---          | 4.910     | 100.0           |
| 41165_g_at  | X67301          | immunoglobulin heavy constant mu                                                                     | IGHM         | 3507         | 5.534     | 83.8            |
| 36105_at    | M18728          | carcinoembryonic antigen-related cell adhesion molecule 6 (non-specific cross reacting antigen)      | CEACAM6      | 4680         | 9.560     | 53.5            |
| 36299_at    | X02330          | calcitonin/calcitonin-related polypeptide, alpha                                                     | CALCA        | 796          | 6.160     | 48.9            |
| 35822_at    | L15702          | B-factor, properdin                                                                                  | BF           | 629          | 3.022     | 45.5            |
| 32821_at    | A1762213        | lipocalin 2 (oncogene 24p3)                                                                          | LN2          | 3634         | 2.456     | 44.0            |
| 1490_at     | M19720          | v-myc myelocytomatosis viral oncogene homolog 1, lung carcinoma derived (avian)                      | MYC1         | 4610         | 3.036     | 35.5            |
| 41164_at    | X67301          | immunoglobulin heavy constant mu                                                                     | IGHM         | 3507         | 5.856     | 30.0            |
| 1582_at     | M29540          | carcinoembryonic antigen-related cell adhesion molecule 5                                            | CEACAM5      | 1048         | 8.310     | 26.5            |
| 31579_at    | AF005082        | skin-specific protein                                                                                | xp33         | 388699       | 6.447     | 25.0            |
| 39842_at    | AF059293        | cytokine receptor-like factor 1                                                                      | CRLF1        | 9244         | 1.848     | 23.2            |
| 37865_at    | J05081          | endothelin 3                                                                                         | EDN3         | 1908         | 3.659     | 22.5            |
| 34566_at    | X02404          | calcitonin-related polypeptide, beta                                                                 | CALCB        | 797          | 3.945     | 21.7            |
| 40035_at    | AB012917        | kallikrein 11                                                                                        | KLK11        | 11012        | 7.269     | 21.5            |
| 37186_s_at  | U11863          | amiloride binding protein 1 (amine oxidase (copper-containing))                                      | ABP1         | 26           | 4.669     | 21.1            |
| 37533_r_at  | D86980          | tetratricopeptide repeat domain 9                                                                    | TTC9         | 23508        | 4.217     | 18.0            |
| 40398_s_at  | A1743406        | mesenchyme homeo box 2 (growth arrest-specific homeo box)                                            | MEOX2        | 4223         | 3.348     | 15.6            |
| 35832_at    | AB029000        | sulfatase 1                                                                                          | SULF1        | 23213        | 7.824     | 15.3            |
| 38582_at    | A1961220        | serine protease inhibitor, Kazal type 1                                                              | SPINK1       | 6690         | 3.837     | 15.1            |
| 33714_at    | Y10043          | high-mobility group box 3                                                                            | HMG3         | 3149         | 5.705     | 14.9            |
| 31536_f_at  | X72475          | immunoglobulin kappa constant                                                                        | IGKC         | 3514         | 6.682     | 14.7            |
| 38524_at    | U48194          | occludin                                                                                             | OCLN         | 4950         | 5.288     | 14.2            |
| 33383_f_at  | A1820718        | surfactant, pulmonary-associated protein B                                                           | SFTPB        | 6439         | 5.290     | 13.8            |
| 31859_at    | J05070          | matrix metalloproteinase 9 (gelatinase B, 92kDa gelatinase, 92kDa type IV collagenase)               | MMP9         | 4318         | 6.573     | 13.8            |
| 36503_at    | AB002409        | chemokine (C-C motif) ligand 21                                                                      | CCL21        | 6366         | 2.566     | 13.6            |
| 31315_at    | D84143          | Immunoglobulin light chain lambda variable region [Homo sapiens], mRNA sequence                      | ---          | ---          | 6.660     | 13.6            |
| 37322_s_at  | X82460          | hydroxyprostaglandin dehydrogenase 15-(NAD)                                                          | HPGD         | 3248         | 3.699     | 13.2            |
| 37637_at    | U27655          | regulator of G-protein signalling 3                                                                  | RGS3         | 5998         | 6.022     | 13.0            |
| 41294_at    | AJ238246        | keratin 7                                                                                            | KRT7         | 3855         | 8.151     | 12.9            |
| 1069_at     | U04636          | prostaglandin-endoperoxide synthase 2 (prostaglandin G/H synthase and cyclooxygenase)                | PTGS2        | 5743         | 5.001     | 12.9            |
| 34105_f_at  | A1147237        | immunoglobulin heavy constant gamma 1 (G1m marker)                                                   | IGHG1        | 3500         | 6.409     | 12.9            |
| 36300_at    | X15943          | calcitonin/calcitonin-related polypeptide, alpha                                                     | CALCA        | 796          | 5.813     | 12.7            |
| 31319_at    | M20707          | Clone 2-12 immunoglobulin light chain mRNA, partial cds                                              | ---          | ---          | 5.100     | 11.8            |
| 39945_at    | U09278          | fibroblast activation protein, alpha                                                                 | FAP          | 2191         | 6.957     | 11.6            |
| 931_at      | L08177          | Epstein-Barr virus induced gene 2 (lymphocyte-specific G protein-coupled receptor)                   | EBI2         | 1880         | 4.401     | 11.4            |
| 37006_at    | A1660656        | immunoglobulin J polypeptide, linker protein for immunoglobulin alpha and mu polypeptides            | IGJ          | 3512         | 6.584     | 11.3            |
| 32305_at    | K01079          | collagen, type I, alpha 2                                                                            | COL1A2       | 1278         | 5.987     | 11.1            |
| 41416_at    | D14446          | fibronectin-like 1                                                                                   | FN1          | 2267         | 7.794     | 11.0            |
| 40041_at    | AF017790        | kinetochore associated 2                                                                             | KNTC2        | 10403        | 4.826     | 11.0            |
| 34095_f_at  | U80114          | immunoglobulin heavy locus                                                                           | IGH@         | 3492         | 7.063     | 10.8            |
| 37971_at    | AL050089        | bromodomain adjacent to zinc finger domain, 1A                                                       | BAZ1A        | 11177        | 3.048     | 10.3            |
| 41827_f_at  | A1932613        | similar to bK246H3.1 (immunoglobulin lambda-like polypeptide 1, pre-B-cell specific)                 | LOC91316     | 91316        | 7.780     | 10.1            |
| 33070_at    | AF041243        | hypocretin (orexin) receptor 1                                                                       | HCRTR1       | 3061         | 6.951     | 10.0            |
| 34193_at    | AF002246        | cell adhesion molecule with homology to L1CAM (close homolog of L1)                                  | CHL1         | 10752        | 4.914     | 9.8             |
| 35566_f_at  | AF015128        | immunoglobulin heavy constant gamma 1 (G1m marker)                                                   | IGHG1        | 3500         | 6.347     | 9.7             |
| 40328_at    | X99268          | twist homolog 1 (acrocephalosyndactyly 3; Saethre-Chotzen syndrome) (Drosophila)                     | TWIST1       | 7291         | 3.742     | 9.6             |
| 34094_i_at  | U80114          | immunoglobulin heavy constant gamma 1 (G1m marker)                                                   | IGHG1        | 3500         | 6.802     | 9.6             |
| 37864_s_at  | AJ001564        | immunoglobulin heavy constant gamma 4 (G4m marker)                                                   | IGHG4        | 3503         | 7.975     | 9.5             |
| 37422_at    | S71018          | peptidylprolyl isomerase C (cyclophilin C)                                                           | PPIC         | 5480         | 6.709     | 9.5             |
| 39515_s_at  | W27099          | processing of precursor 5, ribonuclease P/MRP subunit (S. cerevisiae)                                | POP5         | 51367        | 5.919     | 9.5             |
| 37425_g_at  | AB029343        | chromosome 6 open reading frame 18                                                                   | C6orf18      | 54535        | 3.781     | 9.3             |
| 40385_at    | U64197          | chemokine (C-C motif) ligand 20                                                                      | CCL20        | 6364         | 3.129     | 9.2             |
| 33274_f_at  | X79783          | immunoglobulin lambda joining 3                                                                      | IGLJ3        | 28831        | 7.967     | 9.1             |
| 36879_at    | M63193          | endothelial cell growth factor 1 (platelet-derived)                                                  | ECGF1        | 1890         | 7.018     | 9.0             |
| 38087_s_at  | W72186          | S100 calcium binding protein A4 (calcium protein, calvasculin, metastasin, murine placental homolog) | S100A4       | 6175         | 5.844     | 8.7             |
| 370129_at   | J030129         | fibronectin, B beta polypeptide                                                                      | FN2          | 5244         | 3.244     | 8.5             |
| 33273_f_at  | J03011          | immunoglobulin lambda joining 3                                                                      | IGLJ3        | 28831        | 7.973     | 8.5             |
| 31888_s_at  | AF001294        | pleckstrin homology-like domain, family A, member 2                                                  | PHLDA2       | 7262         | 5.986     | 8.3             |
| 37497_at    | L16499          | hematopoietically expressed homeobox                                                                 | HHEX         | 3087         | 3.601     | 8.2             |
| 36239_at    | Z49194          | POU domain, class 2, associating factor 1                                                            | POU2AF1      | 5450         | 5.406     | 8.1             |
| 1197_at     | D00654          | actin, gamma 2, smooth muscle, enteric                                                               | ACTG2        | 72           | 2.908     | 8.0             |
| 32368_at    | AF061573        | protocadherin 8                                                                                      | PCDH8        | 5100         | 2.754     | 7.9             |
| 1147_at     | HG3510-HT3704   | V-Erba Related Ear-3 Protein                                                                         | ---          | ---          | 2.078     | 7.7             |
| 658_at      | L12350          | thrombospondin 2                                                                                     | THBS2        | 7058         | 5.997     | 7.6             |
| 37231_at    | D13633          | discs, large homolog 7 (Drosophila)                                                                  | DLG7         | 9787         | 4.262     | 7.6             |
| 33500_i_at  | S71043          | hypothetical protein MGC27165                                                                        | MGC27165     | 283650       | 5.764     | 7.5             |
| 41109_at    | M31452          | complement component 4 binding protein, alpha                                                        | C4BPA        | 722          | 2.515     | 7.4             |
| 36070_at    | AL049389        | KIAA1199 protein                                                                                     | KIAA1199     | 57214        | 6.626     | 7.3             |
| 34342_s_at  | AF052124        | secreted phosphoprotein 1 (osteopontin, bone sialoprotein I, early T-lymphocyte activation 1)        | SPP1         | 6696         | 6.045     | 7.3             |
| 33904_at    | AB000714        | claudin 3                                                                                            | CLDN3        | 1365         | 6.347     | 7.2             |
| 14105_l_at  | M21121          | chemokine (C-C motif) ligand 5                                                                       | CCL5         | 6362         | 5.469     | 7.2             |
| 1482_g_at   | L23808          | matrix metalloproteinase 12 (macrophage elastase)                                                    | MMP12        | 4321         | 6.015     | 7.2             |
| 38194_s_at  | M63438          | immunoglobulin kappa variable 3D-15                                                                  | IGKV3D-15    | 28875        | 8.366     | 7.2             |
| 34033_s_at  | U82278          | leukocyte immunoglobulin-like receptor, subfamily A (with TM domain), member 2                       | LILRA2       | 11027        | 2.349     | 7.1             |
| 2092_s_at   | J04765          | secreted phosphoprotein 1 (osteopontin, bone sialoprotein I, early T-lymphocyte activation 1)        | SPP1         | 6696         | 5.284     | 7.1             |
| 33143_s_at  | U81800          | solute carrier family 16 (monocarboxylic acid transporters), member 3                                | SLC16A3      | 9123         | 5.980     | 6.9             |
| 37892_at    | J04177          | collagen, type XI, alpha 1                                                                           | COL11A1      | 1301         | 2.721     | 6.9             |
| 33499_s_at  | AF067420        | hypothetical protein MGC27165                                                                        | MGC27165     | 283650       | 5.838     | 6.8             |
| 1451_s_at   | D13666          | periostin, osteoblast specific factor                                                                | POSTN        | 10631        | 7.646     | 6.8             |
| 38583_at    | Y15014          | UDP-Gal:betaGlcNAc beta 1,3-galactosyltransferase, polypeptide 2                                     | B3GALT2      | 8707         | 3.443     | 6.8             |
| 38469_at    | M35252          | transmembrane 4 superfamily member 3                                                                 | TM4SF3       | 7103         | 4.817     | 6.7             |
| 35902_at    | AJ132820        | a disintegrin and metalloproteinase domain 5                                                         | ADAM5        | 255926       | 6.164     | 6.6             |
| 32306_g_at  | K01079          | collagen, type I, alpha 2                                                                            | COL1A2       | 1278         | 7.993     | 6.6             |
| 38324_at    | AD000684        | liver-specific bHLH-Zip transcription factor                                                         | LISCH7       | 51599        | 5.853     | 6.6             |
| 33501_r_at  | S71043          | hypothetical protein MGC27165                                                                        | MGC27165     | 283650       | 5.775     | 6.5             |
| 1481_at     | L23808          | matrix metalloproteinase 12 (macrophage elastase)                                                    | MMP12        | 4321         | 5.748     | 6.4             |
| 40456_at    | AL049863        | solute carrier family 39 (zinc transporter), member 8                                                | SLC39A8      | 64116        | 6.519     | 6.4             |
| 41470_at    | AF027208        | prominin 1                                                                                           | PROM1        | 8842         | 4.972     | 6.4             |
| 35735_at    | M65542          | guanylate binding protein 1, interferon-inducible, 67kDa                                             | GBP1         | 2633         | 7.454     | 6.3             |
| 40145_at    | A1375913        | topoisomerase (DNA) II alpha 170kDa                                                                  | TOP2A        | 7153         | 5.574     | 6.3             |
| 36861_at    | AL049946        | adican                                                                                               | DKFZp5641922 | 25878        | 4.551     | 6.3             |
| 859_at      | U03688          | cytochrome P450, family 1, subfamily B, polypeptide 1                                                | CYP1B1       | 1545         | 8.108     | 6.2             |
| 38111_at    | X15998          | chondroitin sulfate proteoglycan 2 (versican)                                                        | CSPG2        | 1462         | 7.162     | 6.1             |
| 40071_at    | U03688          | cytochrome P450, family 1, subfamily B, polypeptide 1                                                | CYP1B1       | 1545         | 8.171     | 6.1             |
| 35927_r_at  | AF090005        | leukocyte immunoglobulin-like receptor, subfamily B (with TM and ITIM domains), member 1             | LILRB1       | 10859        | 6.401     | 6.1             |
| 703_at      | HG3731-HT4001   | Immunoglobulin Heavy Chain, Vdjrj Regions                                                            | ---          | ---          | 6.060     | 6.1             |
| 31720_s_at  | M10905          | fibronectin 1                                                                                        | FN1          | 2335         | 9.146     | 6.0             |
| 33754_at    | U43203          | thyroid transcription factor 1                                                                       | TTF1         | 7080         | 8.314     | 6.0             |
| 32488_at    | X06700          | collagen, type III, alpha 1 (Ehlers-Danlos syndrome type IV, autosomal dominant)                     | COL3A1       | 1281         | 8.360     | 6.0             |
| 904_s_at    | L47276          | topoisomerase (DNA) II alpha 170kDa                                                                  | TOP2A        | 7153         | 5.493     | 5.8             |
| 33133_at    | U80184          | flightless I homolog (Drosophila)                                                                    | FLII         | 2314         | 6.337     | 5.6             |
| 40519_at    | Y00638          | protein tyrosine phosphatase, receptor type, C                                                       | PTPRC        | 5788         | 5.588     | 5.6             |
| 38077_at    | X52022          | collagen, type VI, alpha 3                                                                           | COL6A3       | 1293         | 7.459     | 5.4             |
| 32239_at    | U69263          | matrilin 2                                                                                           | MATN2        | 4147         | 3.038     | 5.4             |
| 31460_f_at  | AF043586        | immunoglobulin lambda joining 3                                                                      | IGLJ3        | 28831        | 4.754     | 5.4             |
| 35590_s_at  | X81832          | gastric inhibitory polypeptide receptor                                                              | GIPR         | 2696         | 6.659     | 5.4             |
| 34319_at    | AA131149        | S100 calcium binding protein P                                                                       | S100P        | 6286         | 3.251     | 5.4             |
| 36133_at    | AL031058        | desmoplakin                                                                                          | DSP          | 1832         | 7.345     | 5.4             |
| 38299_at    | X04430          | interleukin 6 (interferon, beta 2)                                                                   | IL6          | 3569         | 4.476     | 5.3             |
| 37141_at    | U39840          | forkhead box A1                                                                                      | FOXA1        | 3169         | 7.060     | 5.2             |

|            |               |                                                                                          |          |        |        |     |
|------------|---------------|------------------------------------------------------------------------------------------|----------|--------|--------|-----|
| 41239_r_at | M90696        | cathepsin S                                                                              | CTSS     | 1520   | 4.702  | 5.1 |
| 35372_r_at | M28130        | interleukin 8                                                                            | IL8      | 3576   | 4.304  | 5.1 |
| 31719_at   | X02761        | fibronectin 1                                                                            | FN1      | 2335   | 9.607  | 5.1 |
| 38017_at   | U05259        | CD79A antigen (immunoglobulin-associated alpha)                                          | CD79A    | 973    | 5.321  | 5.1 |
| 33998_at   | U91618        | neurotensin                                                                              | NTS      | 4922   | 2.565  | 5.0 |
| 40518_at   | Y00062        | protein tyrosine phosphatase, receptor type, C                                           | PTPRC    | 5788   | 5.448  | 5.0 |
| 35926_s_at | AF009005      | leukocyte immunoglobulin-like receptor, subfamily B (with TM and ITIM domains), member 1 | LILRB1   | 10859  | 7.143  | 5.0 |
| 291_s_at   | J04152        | tumor-associated calcium signal transducer 2                                             | TACSTD2  | 4070   | 4.585  | 4.9 |
| 36500_at   | AF030186      | glypican 4                                                                               | GPC4     | 2239   | 4.058  | 4.9 |
| 38976_at   | D44497        | coronin, actin binding protein, 1A                                                       | CORO1A   | 11151  | 6.920  | 4.9 |
| 38112_g_at | X15998        | chondroitin sulfate proteoglycan 2 (versican)                                            | CSPG2    | 1462   | 6.816  | 4.8 |
| 38853_at   | X81892        | G protein-coupled receptor 64                                                            | GPR64    | 10149  | 3.618  | 4.8 |
| 32307_s_at | V00503        | collagen, type I, alpha 2                                                                | COL1A2   | 1278   | 8.262  | 4.8 |
| 32818_at   | X78565        | tenascin C (hexabrachion)                                                                | TNC      | 3371   | 4.270  | 4.8 |
| 32570_at   | L76465        | hydroxyprostaglandin dehydrogenase 15-(NAD)                                              | HPGD     | 3248   | 4.105  | 4.7 |
| 41048_at   | D90070        | phorbol-12-myristate-13-acetate-induced protein 1                                        | PMAIP1   | 5366   | 4.786  | 4.7 |
| 33641_g_at | Y14768        | allograft inflammatory factor 1                                                          | AIF1     | 199    | 4.144  | 4.7 |
| 38827_at   | AF038451      | anterior gradient 2 homolog (Xenopus laevis)                                             | AGR2     | 10551  | 4.021  | 4.7 |
| 311_s_at   | HG3044-HT3742 | Fibronectin, Alt. Splice 1                                                               | ---      | ---    | 8.613  | 4.7 |
| 37215_at   | AF046798      | phosphorylase, glycogen; liver (Hers disease, glycogen storage disease type VI)          | PYGL     | 5836   | 3.491  | 4.6 |
| 37099_at   | A1806222      | arachidonate 5-lipoxygenase-activating protein                                           | ALOX5AP  | 241    | 4.714  | 4.6 |
| 548_s_at   | S80267        | spleen tyrosine kinase                                                                   | SYK      | 6850   | 9.851  | 4.6 |
| 37343_at   | U01062        | inositol 1,4,5-triphosphate receptor, type 3                                             | ITPR3    | 3710   | 6.462  | 4.6 |
| 37187_at   | M36820        | chemokine (C-X-C motif) ligand 2                                                         | CXCL2    | 2920   | 4.670  | 4.5 |
| 40079_at   | AA156240      | retinoic acid induced 3                                                                  | RAI3     | 9052   | 4.522  | 4.5 |
| 40544_g_at | L08424        | achaete-scute complex-like 1 (Drosophila)                                                | ASCL1    | 429    | 5.876  | 4.5 |
| 645_at     | L26336        | heat shock 70kDa protein 2                                                               | HSPA2    | 3306   | 2.928  | 4.5 |
| 1343_s_at  | S66896        | serine (or cysteine) proteinase inhibitor, clade B (ovalbumin), member 3                 | SERPINF3 | 6317   | 1.793  | 4.5 |
| 35530_f_at | X92997        | Immunoglobulin lambda light chain variable and constant region mRNA, partial cds         | ---      | ---    | 6.461  | 4.4 |
| 31811_r_at | L11667        | peptidylprolyl isomerase D (cyclophilin D)                                               | PPID     | 5481   | 1.670  | 4.4 |
| 40757_at   | M18737        | granzyme A (granzyme 1, cytotoxic T-lymphocyte-associated serine esterase 3)             | GZMA     | 3001   | 6.765  | 4.4 |
| 128_at     | X82153        | cathepsin K (pseudosostosis)                                                             | CTSK     | 1513   | 4.461  | 4.4 |
| 32715_at   | AF053233      | vesicle-associated membrane protein 8 (endobrevin)                                       | VAMP8    | 8673   | 10.338 | 4.3 |
| 32916_at   | X54134        | protein tyrosine phosphatase, receptor type, E                                           | PTPRE    | 5791   | 4.631  | 4.3 |
| 41069_at   | AB006000      | leukocyte cell derived chemotaxin 1                                                      | LECT1    | 11061  | 2.648  | 4.3 |
| 33933_at   | X63187        | WAP four-disulfide core domain 2                                                         | WFDC2    | 10406  | 4.094  | 4.3 |
| 37168_at   | AB013924      | lysosomal-associated membrane protein 3                                                  | LAMP3    | 27074  | 4.625  | 4.3 |
| 37714_at   | M25667        | growth associated protein 43                                                             | GAP43    | 2596   | 2.904  | 4.2 |
| 37899_at   | X02308        | thymidylate synthetase                                                                   | TYMS     | 7298   | 5.547  | 4.2 |
| 38116_at   | D14657        | KIAA0101 gene product                                                                    | KIAA0101 | 9768   | 7.244  | 4.2 |
| 649_s_at   | L06797        | chemokine (C-X-C motif) receptor 4                                                       | CXCR4    | 7852   | 6.262  | 4.1 |
| 39260_at   | U91485        | solute carrier family 16 (monocarboxylic acid transporters), member 4                    | SLC16A4  | 9122   | 3.586  | 4.1 |
| 195_s_at   | U28014        | casease 4, apoptosis-related cysteine protease                                           | CASP4    | 837    | 6.842  | 4.1 |
| 34245_at   | W25917        | chromosome 6 open reading frame 145                                                      | C6orf145 | 221749 | 8.435  | 4.1 |
| 700_s_at   | HG371-HT26388 | Mucin 1, Epithelial, Alt. Splice 9                                                       | ---      | ---    | 4.033  | 4.1 |
| 38420_at   | Y14690        | collagen, type V, alpha 2                                                                | COL5A2   | 1290   | 5.198  | 4.1 |
| 37552_at   | U33632        | potassium channel, subfamily K, member 1                                                 | KCNK1    | 3775   | 4.318  | 4.1 |
| 35249_at   | AF102778      | cyclin E2                                                                                | CNE2     | 9134   | 3.731  | 4.1 |
| 41592_at   | AB005043      | suppressor of cytokine signaling 1                                                       | SOCS1    | 8651   | 4.312  | 4.0 |
| 1385_at    | M77349        | transforming growth factor, beta-induced, 68kDa                                          | TGFB1    | 7045   | 5.541  | 4.0 |
| 38466_at   | X82153        | cathepsin K (pseudosostosis)                                                             | CTSK     | 1513   | 5.936  | 4.0 |
| 39605_at   | X74142        | forkhead box G1B                                                                         | FOXP1    | 2290   | 3.067  | 4.0 |
| 35766_at   | X12883        | keratin 18                                                                               | KRT18    | 3875   | 7.363  | 4.0 |
| 41819_at   | U93049        | FYN binding protein (FYB-120/130)                                                        | FYB      | 2533   | 5.962  | 4.0 |
| 38391_at   | M94345        | capping protein (actin filament), gelsolin-like                                          | CAPG     | 822    | 7.577  | 3.9 |
| 36533_at   | D83402        | prostaglandin I2 (prostaglyclin) synthase                                                | PTGIS    | 5740   | 5.054  | 3.9 |
| 38379_at   | X76534        | glycoprotein (transmembrane) nmb                                                         | GNPMB    | 10457  | 5.259  | 3.9 |
| 31798_at   | AA314625      | trefoil factor 1 (breast cancer, estrogen-inducible sequence expressed in)               | TFF1     | 7031   | 3.064  | 3.9 |
| 41036_at   | AB011421      | neutrophil cytosolic factor 2 (65kDa, chronic granulomatous disease, autosomal 2)        | NCF2     | 4688   | 4.703  | 3.9 |
| 37524_at   | U28014        | serine/threonine kinase 17b (apoptosis-inducing)                                         | STK17B   | 9262   | 6.877  | 3.9 |
| 37897_s_at | A1985964      | trefoil factor 3 (intestinal)                                                            | TFF3     | 7033   | 5.750  | 3.8 |
| 41433_at   | M73255        | vascular cell adhesion molecule 1                                                        | VCAM1    | 7412   | 4.239  | 3.8 |
| 31477_at   | L08044        | trefoil factor 3 (intestinal)                                                            | TFF3     | 7033   | 6.322  | 3.8 |
| 37759_at   | U51240        | Lysosomal-associated multispansing membrane protein-5                                    | LAPTM5   | 7805   | 7.051  | 3.8 |
| 38578_at   | M63928        | tumor necrosis factor receptor superfamily, member 7                                     | TNFRSF7  | 939    | 5.375  | 3.8 |
| 1404_r_at  | M21121        | chemokine (C-C motif) ligand 5                                                           | CCL5     | 6352   | 2.387  | 3.8 |
| 39421_at   | D43969        | runt-related transcription factor 1 (acute myeloid leukemia 1; aml1 oncogene)            | RUNX1    | 861    | 8.487  | 3.8 |
| 1123_at    | L01406        | growth hormone releasing hormone receptor                                                | GHRHR    | 2692   | 6.804  | 3.8 |
| 35362_at   | AB018342      | myosin X                                                                                 | MYO10    | 4651   | 4.180  | 3.8 |
| 36108_at   | M16276        | major histocompatibility complex, class II, DQ beta 1                                    | HLA-DQB1 | 3119   | 4.087  | 3.7 |
| 38404_at   | M55153        | transglutaminase 2 (C polypeptide, protein-glutamine-gamma-glutamyltransferase)          | TGM2     | 7052   | 6.441  | 3.7 |
| 774_g_at   | D10667        | myosin, heavy polypeptide 11, smooth muscle                                              | MYH11    | 4629   | 2.366  | 3.7 |
| 36889_at   | M33195        | Fc fragment of IgE, high affinity I, receptor for; gamma polypeptide                     | FCER1G   | 2207   | 7.332  | 3.7 |
| 38784_g_at | J05581        | mucin 1, transmembrane                                                                   | MUC1     | 4582   | 4.029  | 3.7 |
| 182_at     | U01062        | inositol 1,4,5-triphosphate receptor, type 3                                             | ITPR3    | 3710   | 5.886  | 3.7 |
| 406_at     | X54489        | chemokine (C-X-C motif) ligand 2                                                         | CXCL2    | 2920   | 3.162  | 3.7 |
| 943_at     | D43968        | runt-related transcription factor 1 (acute myeloid leukemia 1; aml1 oncogene)            | RUNX1    | 861    | 9.283  | 3.7 |
| 33956_at   | AB018549      | lymphocyte antigen 96                                                                    | LY96     | 23643  | 7.483  | 3.7 |
| 40642_at   | A1312646      | nuclear factor I/B                                                                       | NFIB     | 4781   | 6.658  | 3.6 |
| 1262_s_at  | M19154        | transforming growth factor, beta 2                                                       | TGFB2    | 7042   | 3.530  | 3.6 |
| 32314_g_at | M75165        | tropomyosin 2 (beta)                                                                     | TPM2     | 7169   | 4.846  | 3.6 |
| 39008_at   | M13699        | ceruloplasmin (ferroxidase)                                                              | CP       | 1356   | 3.864  | 3.6 |
| 34678_at   | AL096713      | fer-1-like 3, myoferlin (C. elegans)                                                     | FER1L3   | 26509  | 7.463  | 3.6 |
| 32083_at   | AF027826      | transmembrane 7 superfamily member 1 (upregulated in kidney)                             | TM7SF1   | 7107   | 3.262  | 3.6 |
| 36689_at   | AL040446      | oxysterol binding protein-like 1A                                                        | OSBPL1A  | 114876 | 3.399  | 3.5 |
| 33131_at   | X70683        | SRY (sex determining region Y)-box 4                                                     | SOX4     | 6659   | 7.140  | 3.5 |
| 38138_at   | AC004668      | S100 calcium binding protein A11 (calgizzarin)                                           | S100A11  | 6282   | 5.565  | 3.5 |
| 36397_at   | U62434        | cholinergic receptor, nicotinic, alpha polypeptide 5                                     | CHRNA5   | 1138   | 3.441  | 3.4 |
| 36496_at   | AF014398      | inositol(myo)-1(or 4)-monophosphatase 2                                                  | IMPA2    | 3613   | 4.542  | 3.4 |
| 34203_at   | D17408        | calponin 1, basic, smooth muscle                                                         | CNN1     | 1264   | 3.861  | 3.4 |
| 38038_at   | U21128        | lumican                                                                                  | LUM      | 4080   | 8.584  | 3.4 |
| 36681_at   | J02911        | apolipoprotein D                                                                         | APOD     | 347    | 3.354  | 3.4 |
| 925_at     | J03909        | interferon, gamma-inducible protein 30                                                   | IFI30    | 10437  | 9.043  | 3.4 |
| 1371_s_at  | M29874        | cytochrome P450, family 2, subfamily B, polypeptide 6                                    | CYP2B6   | 1555   | 3.444  | 3.4 |
| 675_at     | J04164        | interferon induced transmembrane protein 1 (9-27)                                        | IFITM1   | 8519   | 6.128  | 3.4 |
| 32451_at   | L35848        | membrane-spanning 4-domains, subfamily A, member 3 (hematopoietic cell-specific)         | MS4A3    | 932    | 5.668  | 3.4 |
| 38013_at   | AL096842      | mitochondrial tumor suppressor 1                                                         | MTUS1    | 57509  | 4.513  | 3.4 |
| 40522_at   | X59834        | glutamate-ammonia ligase (glutamine synthase)                                            | GLUL     | 2752   | 8.219  | 3.4 |
| 32404_at   | AF065314      | cyclic nucleotide gated channel alpha 3                                                  | CNGA3    | 1261   | 3.816  | 3.4 |
| 39728_at   | J03909        | interferon, gamma-inducible protein 30                                                   | IFI30    | 10437  | 9.556  | 3.3 |
| 36575_at   | S59049        | regulator of G-protein signalling 1                                                      | RGS1     | 5996   | 6.548  | 3.3 |
| 37407_s_at | AF013570      | myosin, heavy polypeptide 11, smooth muscle                                              | MYH11    | 4629   | 2.748  | 3.3 |
| 1501_at    | X57025        | insulin-like growth factor 1 (somatomedin C)                                             | IGF1     | 3479   | 3.031  | 3.3 |
| 659_g_at   | L12350        | thrombospondin 2                                                                         | THBS2    | 7058   | 5.066  | 3.3 |
| 32454_at   | AL080215      | MRNA; cDNA DKFZp586J0323 (from clone DKFZp586J0323)                                      | ---      | ---    | 2.390  | 3.3 |
| 32081_at   | AB023166      | citron (rho-interacting, serine/threonine kinase 21)                                     | CIT      | 11113  | 3.426  | 3.3 |
| 36543_at   | J02931        | coagulation factor III (thromboplastin, tissue factor)                                   | F3       | 2152   | 4.152  | 3.3 |
| 32985_at   | AF017655      | sal-like 1 (Drosophila)                                                                  | SALL1    | 6299   | 3.334  | 3.3 |
| 38422_s_at | U29332        | four and a half LIM domains 2                                                            | FHL2     | 2274   | 5.225  | 3.3 |
| 40543_at   | L08424        | achaete-scute complex-like 1 (Drosophila)                                                | ASCL1    | 429    | 4.370  | 3.2 |
| 38754_at   | A1557295      | ceroid-lipofuscinosis, neuronal 3, juvenile (Batten, Spielmeier-Vogt disease)            | CLN3     | 1201   | 6.740  | 3.2 |
| 40715_at   | D83597        | lymphocyte antigen 64 homolog, radioprotective 105kDa (mouse)                            | LY64     | 4064   | 1.753  | 3.2 |
| 39695_at   | M31516        | decay accelerating factor for complement (CD55, Cromer blood group system)               | DAF      | 1604   | 5.928  | 3.2 |
| 37061_at   | U29615        | chitinase 1 (chitotriosidase)                                                            | CHIT1    | 1118   | 3.701  | 3.2 |

|            |               |                                                                                                                    |               |       |       |     |
|------------|---------------|--------------------------------------------------------------------------------------------------------------------|---------------|-------|-------|-----|
| 34878_at   | AB019987      | SMC4 structural maintenance of chromosomes 4-like 1 (yeast)                                                        | SMC4L1        | 10051 | 5.363 | 3.2 |
| 37208_at   | AJ001612      | phosphoserine phosphatase                                                                                          | PSPH          | 5723  | 2.130 | 3.2 |
| 35367_at   | AB006780      | lectin, galactoside-binding, soluble, 3 (galectin 3)                                                               | LGALS3        | 3958  | 6.051 | 3.2 |
| 38691_s_at | J03553        | surfactant, pulmonary-associated protein C                                                                         | SFTPC         | 6440  | 2.106 | 3.2 |
| 35168_f_at | M92642        | collagen, type XVI, alpha 1                                                                                        | COL16A1       | 1307  | 5.214 | 3.2 |
| 34007_at   | AJ236922      | glutamate receptor, metabotropic 8                                                                                 | GRM8          | 2918  | 2.149 | 3.2 |
| 31682_s_at | D32039        | chondroitin sulfate proteoglycan 2 (versican)                                                                      | CSPG2         | 1462  | 7.100 | 3.2 |
| 37021_at   | X16832        | cathepsin H                                                                                                        | CTSH          | 1512  | 7.046 | 3.2 |
| 36227_at   | AF043129      | interleukin 7 receptor                                                                                             | IL7R          | 3575  | 5.796 | 3.2 |
| 1280_i_at  | HG2702-HT2798 | Serine/Threonine Kinase                                                                                            | ---           | ---   | 5.638 | 3.2 |
| 37688_f_at | M31932        | Fc fragment of IgG, low affinity Ila, receptor for (CD32)                                                          | FCGR2A        | 2212  | 5.664 | 3.2 |
| 34378_at   | X97324        | adipose differentiation-related protein                                                                            | ADFP          | 123   | 6.629 | 3.2 |
| 33244_at   | U07223        | chimerin (chimaerin) 2                                                                                             | CHN2          | 1124  | 3.029 | 3.2 |
| 35964_at   | AJ224741      | matrilin 3                                                                                                         | MATN3         | 4148  | 2.705 | 3.2 |
| 40496_at   | J04080        | complement component 1, s subcomponent                                                                             | C1S           | 716   | 6.992 | 3.2 |
| 33331_at   | U17077        | BENE protein                                                                                                       | BENE          | 7851  | 4.861 | 3.1 |
| 38059_g_at | Z22865        | dermatopontin                                                                                                      | DPT           | 1805  | 2.640 | 3.1 |
| 36059_at   | AB011540      | low density lipoprotein receptor-related protein 4                                                                 | LRP4          | 4038  | 3.424 | 3.1 |
| 39176_f_at | M54994        | carboxyl ester lipase (bile salt-stimulated lipase)                                                                | CEL           | 1056  | 2.277 | 3.1 |
| 31344_at   | AF063725      | Clone BCSynL38 immunoglobulin lambda light chain variable region mRNA, partial cds                                 | ---           | ---   | 4.724 | 3.1 |
| 38378_at   | M37033        | CD53 antigen                                                                                                       | CD53          | 963   | 6.393 | 3.1 |
| 36203_at   | X16277        | ornithine decarboxylase 1                                                                                          | ODC1          | 4953  | 4.144 | 3.1 |
| 37645_at   | Z22576        | CD69 antigen (p60, early T-cell activation antigen)                                                                | CD69          | 969   | 3.327 | 3.1 |
| 41176_at   | AF052162      | hypothetical protein FLJ12443                                                                                      | FLJ12443      | 79888 | 6.430 | 3.1 |
| 41353_at   | Z29574        | tumor necrosis factor receptor superfamily, member 17                                                              | TNFRSF17      | 608   | 5.799 | 3.1 |
| 41177_at   | AW024285      | hypothetical protein FLJ12443                                                                                      | FLJ12443      | 79889 | 6.093 | 3.1 |
| 41073_at   | AI743745      | G protein-coupled receptor 49                                                                                      | GPR49         | 8549  | 3.528 | 3.1 |
| 34304_s_at | AL050290      | spermidine/spermine N1-acetyltransferase                                                                           | SAT           | 6303  | 9.191 | 3.0 |
| 1599_at    | L25876        | cyclin-dependent kinase inhibitor 3 (CDK2-associated dual specificity phosphatase)                                 | CDKN3         | 1033  | 2.082 | 3.0 |
| 35479_at   | AJ242015      | a disintegrin and metalloproteinase domain 28                                                                      | ADAM28        | 10863 | 4.905 | 3.0 |
| 32134_at   | AL050162      | testis derived transcript (3 LIM domains)                                                                          | TES           | 26136 | 6.289 | 3.0 |
| 40848_g_at | AB018293      | flavoprotein oxidoreductase MICAL2                                                                                 | MICAL2        | 9645  | 6.480 | 3.0 |
| 35937_at   | U65416        | MHC class I polypeptide-related sequence B                                                                         | MICB          | 4277  | 5.991 | 3.0 |
| 32873_at   | AC004888      | potassium voltage-gated channel, Shal-related subfamily, member 2                                                  | KCNQ2         | 3751  | 2.991 | 3.0 |
| 368_at     | Z29083        | trophoblast glycoprotein                                                                                           | TPBG          | 7162  | 4.091 | 3.0 |
| 38734_at   | M63603        | phospholamban                                                                                                      | PLN           | 5350  | 4.216 | 3.0 |
| 41632_at   | D38550        | E2F transcription factor 3                                                                                         | E2F3          | 1871  | 7.699 | 3.0 |
| 34770_at   | Z14138        | mitogen-activated protein kinase kinase kinase 8                                                                   | MAP3K8        | 1326  | 4.572 | 3.0 |
| 32034_at   | AF041259      | zinc finger protein 217                                                                                            | ZNF217        | 7784  | 6.640 | 3.0 |
| 32535_at   | U63556        | fibrillin 1 (Marfan syndrome)                                                                                      | FBN1          | 2200  | 4.670 | 3.0 |
| 35431_at   | U05291        | fibromodulin                                                                                                       | FMDQ          | 2331  | 5.288 | 3.0 |
| 39690_at   | AF032822      | PDZ and LIM domain 3                                                                                               | PDLIM3        | 27295 | 3.692 | 3.0 |
| 542_at     | S74445        | cellular retinoic acid binding protein 1                                                                           | CRABP1        | 1381  | 2.258 | 2.9 |
| 39125_at   | M14083        | serine (or cysteine) proteinase inhibitor, clade E (nexin, plasminogen activator inhibitor type 1), member 1       | SERPINE1      | 5054  | 3.371 | 2.9 |
| 39114_at   | AB022718      | chromosome 10 open reading frame 10                                                                                | C10orf10      | 11067 | 3.678 | 2.9 |
| 37365_at   | X63368        | DnaJ (Hsp40) homolog, subfamily B, member 2                                                                        | DNAJB2        | 3300  | 7.054 | 2.9 |
| 36453_at   | AB018254      | KIAA0711 gene product                                                                                              | KIAA0711      | 9920  | 3.311 | 2.9 |
| 39143_at   | U08015        | nuclear factor of activated T-cells, cytoplasmic, calcineurin-dependent 1                                          | NFATC1        | 4772  | 4.870 | 2.9 |
| 32773_at   | AA868382      | major histocompatibility complex, class II, DQ alpha 1                                                             | HLA-DQA1      | 3117  | 5.277 | 2.9 |
| 34736_at   | M25753        | cyclin B1                                                                                                          | CCNB1         | 891   | 5.732 | 2.9 |
| 32227_at   | X17042        | proteoglycan 1, secretory granule                                                                                  | PRG1          | 5552  | 6.770 | 2.9 |
| 41229_at   | AI222594      | nuclear factor I/B                                                                                                 | NFIB          | 4781  | 6.347 | 2.9 |
| 41815_at   | AL080133      | spectrin repeat containing, nuclear envelope 2                                                                     | SYNE2         | 23224 | 4.477 | 2.9 |
| 1891_at    | D14497        | mitogen-activated protein kinase kinase kinase 8                                                                   | MAP3K8        | 1326  | 5.288 | 2.9 |
| 40915_r_at | Y00272        | cell division cycle 2, G1 to S and G2 to M                                                                         | CDC2          | 983   | 4.244 | 2.9 |
| 37219_at   | X72755        | chemokine (C-X-C motif) ligand 9                                                                                   | CXCL9         | 4283  | 4.695 | 2.9 |
| 41531_at   | AI445461      | transmembrane 4 superfamily member 1                                                                               | TM4SF1        | 4071  | 4.958 | 2.9 |
| 35807_at   | M21186        | cytochrome b-245, alpha polypeptide                                                                                | CYBA          | 1535  | 9.528 | 2.9 |
| 36376_at   | AF030890      | solute carrier family 26, member 4                                                                                 | SLC26A4       | 5172  | 2.167 | 2.9 |
| 1054_at    | M87339        | replication factor C (activator 1) 4, 37kDa                                                                        | RFC4          | 5984  | 3.608 | 2.9 |
| 37200_at   | J04162        | Fc fragment of IgG, low affinity IIIa, receptor for (CD16)                                                         | FCGR3A        | 2214  | 6.081 | 2.9 |
| 39167_r_at | D83174        | serine (or cysteine) proteinase inhibitor, clade H (heat shock protein 47), member 1, (collagen binding protein 1) | SERPINH1      | 871   | 6.144 | 2.8 |
| 41064_at   | AL049296      | likely ortholog of mouse nervous system polycmb 1                                                                  | NSPC1         | 84759 | 5.978 | 2.8 |
| 37233_at   | AF079167      | oxidized low density lipoprotein (lectin-like) receptor 1                                                          | OLR1          | 4973  | 4.206 | 2.8 |
| 37842_at   | AF054589      | I-mfa domain-containing protein                                                                                    | HIC           | 29969 | 6.020 | 2.8 |
| 40051_at   | D31762        | translocation associated membrane protein 2                                                                        | TRAM2         | 9697  | 5.793 | 2.8 |
| 38805_at   | X89750        | TGF-beta-induced factor (TAFE family homeobox)                                                                     | TGIF          | 7050  | 7.490 | 2.8 |
| 133_at     | X87212        | cathepsin C                                                                                                        | CTSC          | 1075  | 6.331 | 2.8 |
| 37576_at   | U52969        | Purkinje cell protein 4                                                                                            | PCP4          | 5121  | 2.507 | 2.8 |
| 32582_at   | X69292        | myosin, heavy polypeptide 11, smooth muscle                                                                        | MYH11         | 4629  | 2.903 | 2.8 |
| 39677_at   | D80008        | KIAA0186 gene product                                                                                              | KIAA0186      | 9837  | 5.816 | 2.8 |
| 31870_at   | X14046        | CD37 antigen                                                                                                       | CD37          | 951   | 4.414 | 2.8 |
| 37405_at   | U29091        | selenium binding protein 1                                                                                         | SELENBP1      | 8991  | 6.740 | 2.8 |
| 33279_s_at | X80062        | SA hypertension-associated homolog (rat)                                                                           | SAH           | 6296  | 4.769 | 2.8 |
| 36079_at   | AF010309      | tumor protein p53 inducible protein 3                                                                              | TP53I3        | 9540  | 4.948 | 2.8 |
| 41401_at   | U57646        | cysteine and glycine-rich protein 2                                                                                | CGRP2         | 1466  | 5.246 | 2.8 |
| 35961_at   | AL049390      | MRNA, cDNA DKFZp586O1318 (from clone DKFZp586O1318)                                                                | ---           | ---   | 3.442 | 2.8 |
| 39069_at   | AF053944      | AE binding protein 1                                                                                               | AEBP1         | 165   | 3.991 | 2.8 |
| 35985_at   | AB023137      | A kinase (PRKA) anchor protein 2                                                                                   | AKAP2         | 11217 | 5.366 | 2.8 |
| 35729_at   | AB018270      | myosin ID                                                                                                          | MYO1D         | 4642  | 6.349 | 2.8 |
| 34267_r_at | U50748        | leptin receptor                                                                                                    | LEPR          | 3953  | 2.242 | 2.8 |
| 40767_at   | M59499        | tissue factor pathway inhibitor (lipoprotein-associated coagulation inhibitor)                                     | TFPI          | 7035  | 4.587 | 2.8 |
| 37749_at   | D78611        | mesoderm specific transcript homolog (mouse)                                                                       | MEST          | 4232  | 4.830 | 2.8 |
| 36708_at   | J04970        | carboxypeptidase M                                                                                                 | CPM           | 1368  | 5.578 | 2.7 |
| 41504_s_at | AF055376      | v-maf musculoaponeurotic fibrosarcoma oncogene homolog (avian)                                                     | MAF           | 4094  | 5.231 | 2.7 |
| 41365_at   | Y09788        | mucin 5, subtype B, tracheobronchial                                                                               | MUC5B         | 4587  | 3.024 | 2.7 |
| 575_s_at   | M93036        | tumor-associated calcium signal transducer 1                                                                       | TACSTD1       | 4072  | 6.000 | 2.7 |
| 2042_s_at  | M15024        | v-myb myeloblastosis viral oncogene homolog (avian)                                                                | MYB           | 4602  | 2.499 | 2.7 |
| 757_at     | D28364        | annexin A2                                                                                                         | ANXA2         | 302   | 6.352 | 2.7 |
| 35370_at   | AB018307      | SPTF-associated factor 65 gamma                                                                                    | STAF65(gamma) | 9913  | 6.590 | 2.7 |
| 1456_s_at  | M63838        | interferon, gamma-inducible protein 16                                                                             | IFI16         | 3428  | 5.216 | 2.7 |
| 32112_s_at | AF015732      | absent in melanoma 1                                                                                               | AIM1          | 202   | 4.587 | 2.7 |
| 38028_at   | AL050152      | LIM domain only 3 (rhombotin-like 2)                                                                               | LMO3          | 55895 | 5.669 | 2.7 |
| 1625_at    | HG2309-HT2405 | Insulin-Like Growth Factor I                                                                                       | ---           | ---   | 2.029 | 2.7 |
| 677_s_at   | J04430        | acid phosphatase 5, tartrate resistant                                                                             | ACP5          | 54    | 7.717 | 2.7 |
| 38363_at   | W60864        | TYRO protein tyrosine kinase binding protein                                                                       | TYROBP        | 7305  | 6.211 | 2.7 |
| 1261_i_at  | M16594        | glutathione S-transferase A2                                                                                       | GSTA2         | 2939  | 2.045 | 2.7 |
| 1427_g_at  | D89077        | Src-like adaptor                                                                                                   | SLA           | 6503  | 5.241 | 2.7 |
| 1173_g_at  | HG172-HT3924  | Spermidine/Spermine N1-Acetyltransferase, Alt. Splice 2                                                            | ---           | ---   | 9.337 | 2.7 |
| 36753_at   | U82979        | leukocyte immunoglobulin-like receptor, subfamily B (with TM and ITIM domains), member 4                           | LILRB4        | 11006 | 6.798 | 2.7 |
| 37512_at   | U89281        | 3-hydroxysteroid epimerase                                                                                         | RODH          | 8630  | 4.309 | 2.7 |
| 160031_at  | X63629        | cadherin 3, type 1, P-cadherin (placental)                                                                         | CDH3          | 1001  | 5.752 | 2.6 |
| 32640_at   | M24283        | intercellular adhesion molecule 1 (CD54), human rhinovirus receptor                                                | ICAM1         | 3383  | 4.973 | 2.6 |
| 1761_at    | D37965        | platelet-derived growth factor receptor-like                                                                       | PDGFRL        | 5157  | 5.831 | 2.6 |
| 1372_at    | M31165        | tumor necrosis factor, alpha-induced protein 6                                                                     | TNFAIP6       | 7130  | 5.168 | 2.6 |
| 37018_at   | AI189287      | histone 1, H1c                                                                                                     | HIST1H1C      | 3006  | 3.094 | 2.6 |
| 767_at     | AF001548      | myosin, heavy polypeptide 11, smooth muscle                                                                        | MYH11         | 4629  | 2.585 | 2.6 |
| 1656_s_at  | U07563        | v-abl Abelson murine leukemia viral oncogene homolog 1                                                             | ABL1          | 25    | 3.562 | 2.6 |
| 35226_at   | U71207        | eyes absent homolog 2 (Drosophila)                                                                                 | EYA2          | 2139  | 4.597 | 2.6 |
| 32186_at   | M80244        | solute carrier family 7 (cationic amino acid transporter, y+ system), member 5                                     | SLC7A5        | 8140  | 6.046 | 2.6 |
| 39710_at   | U30521        | chromosome 5 open reading frame 13                                                                                 | C5orf13       | 9315  | 5.736 | 2.6 |
| 39061_at   | D28137        | bone marrow stromal cell antigen 2                                                                                 | BST2          | 684   | 4.787 | 2.6 |
| 39135_at   | AB018310      | KIAA0767 protein                                                                                                   | KIAA0767      | 23151 | 4.622 | 2.6 |
| 40516_at   | L19872        | aryl hydrocarbon receptor                                                                                          | AHR           | 196   | 5.602 | 2.6 |

|            |          |                                                                                                                            |          |        |       |     |
|------------|----------|----------------------------------------------------------------------------------------------------------------------------|----------|--------|-------|-----|
| 38247_at   | U67058   | coagulation factor II (thrombin) receptor-like 1                                                                           | F2RL1    | 2150   | 3.857 | 2.6 |
| 32847_at   | U48959   | myosin, light polypeptide kinase                                                                                           | MYLK     | 4638   | 3.692 | 2.6 |
| 40726_at   | U37426   | kinesin family member 11                                                                                                   | KIF11    | 3832   | 4.419 | 2.6 |
| 40091_at   | U00115   | B-cell CLL/lymphoma 6 (zinc finger protein 51)                                                                             | BCL6     | 604    | 6.263 | 2.6 |
| 1495_at    | M34057   | latent transforming growth factor beta binding protein 1                                                                   | LTBP1    | 4052   | 5.464 | 2.6 |
| 38065_at   | X62534   | high-mobility group box 2                                                                                                  | HMGB2    | 3148   | 4.834 | 2.6 |
| 38288_at   | U69196   | snail homolog 2 (Drosophila)                                                                                               | SNAI2    | 6591   | 2.429 | 2.6 |
| 38661_at   | X75314   | RNA-binding region (RNP1, RRM) containing 1                                                                                | RNFC1    | 55544  | 5.749 | 2.6 |
| 36643_at   | L20817   | discoilin domain receptor family, member 1                                                                                 | DDR1     | 780    | 5.694 | 2.6 |
| 35794_at   | AB023159 | ADP-ribosylation factor guanine nucleotide factor 6                                                                        | EFAR8    | 23362  | 5.971 | 2.6 |
| 41409_at   | AF044896 | chromosome 1 open reading frame 38                                                                                         | C1orf38  | 9473   | 8.029 | 2.5 |
| 39319_at   | U20158   | lymphocyte cytosolic protein 2 (SH2 domain containing leukocyte protein of 76kDa)                                          | LCP2     | 3937   | 5.701 | 2.5 |
| 36906_at   | U73304   | cannabinoid receptor 1 (brain)                                                                                             | CNR1     | 1268   | 1.950 | 2.5 |
| 33876_at   | AL050107 | transcriptional co-activator with PDZ-binding motif (TAZ)                                                                  | TAZ      | 25937  | 5.967 | 2.5 |
| 1478_at    | L10717   | IL2-inducible T-cell kinase                                                                                                | ITK      | 3702   | 2.988 | 2.5 |
| 1633_g_at  | U77735   | pim-2 oncogene                                                                                                             | PIM2     | 11040  | 4.290 | 2.5 |
| 32113_at   | U83115   | absent in melanoma 1                                                                                                       | AIM1     | 202    | 3.485 | 2.5 |
| 39333_at   | M11315   | collagen, type IV, alpha 1                                                                                                 | COL4A1   | 1282   | 4.199 | 2.5 |
| 34202_at   | AL050071 | poliovirus receptor-related 3                                                                                              | PVR3     | 25945  | 2.815 | 2.5 |
| 33390_at   | AA203487 | serine/threonine kinase 17b (apoptosis-inducing)                                                                           | STK17B   | 9262   | 6.001 | 2.5 |
| 31897_at   | U53445   | downregulated in ovarian cancer 1                                                                                          | DOC1     | 11259  | 3.781 | 2.5 |
| 39593_at   | AI432401 | fibrinogen-like 2                                                                                                          | FGL2     | 10875  | 4.352 | 2.5 |
| 272_at     | K02054   | gastrin-releasing peptide                                                                                                  | GRP      | 2922   | 2.184 | 2.5 |
| 1654_at    | X13293   | v-myb myeloblastosis viral oncogene homolog (avian)-like 2                                                                 | MYBL2    | 4605   | 5.096 | 2.5 |
| 33324_s_at | D89357   | cell division cycle 2, G1 to S and G2 to M                                                                                 | CD22     | 983    | 5.512 | 2.5 |
| 34822_at   | U58334   | tumor protein p53 binding protein, 2                                                                                       | TP53BP2  | 7159   | 9.873 | 2.5 |
| 1945_at    | M25753   | cyclin B1                                                                                                                  | CCNB1    | 891    | 5.027 | 2.5 |
| 393_s_at   | X90976   | runt-related transcription factor 1 (acute myeloid leukemia 1; aml1 oncogene)                                              | RUNX1    | 861    | 7.163 | 2.5 |
| 339_at     | AF035752 | caveolin 2                                                                                                                 | CAV2     | 858    | 4.120 | 2.5 |
| 1960_at    | L22967   | L22967/FEATURE= /DEFINITION=HUMC Homo sapiens acidic growth fibroblast growth factor (aFGF) gene sequence                  | ---      | ---    | 2.117 | 2.5 |
| 1062_g_at  | U00672   | interleukin 10 receptor, alpha                                                                                             | IL10RA   | 3587   | 6.006 | 2.5 |
| 1984_s_at  | X69549   | Rho GDP dissociation inhibitor (GDI) beta                                                                                  | ARHGDB   | 397    | 5.973 | 2.5 |
| 977_s_at   | Z35402   | cadherin 1, type 1, E-cadherin (epithelial)                                                                                | CDH1     | 999    | 5.006 | 2.5 |
| 33849_at   | U02020   | pre-B-cell colony enhancing factor 1                                                                                       | PBEF1    | 10135  | 5.832 | 2.5 |
| 37324_at   | X01060   | transferrin receptor (p90, CD71)                                                                                           | TFRC     | 7037   | 6.047 | 2.5 |
| 37170_at   | AB015331 | BMP2 inducible kinase                                                                                                      | BMP2K    | 55589  | 5.194 | 2.5 |
| 404_at     | X52425   | interleukin 4 receptor                                                                                                     | IL4R     | 3566   | 5.819 | 2.5 |
| 40412_at   | AA203476 | pituitary tumor-transforming 1                                                                                             | PTTG1    | 9232   | 5.984 | 2.5 |
| 33462_at   | D13626   | G protein-coupled receptor 105                                                                                             | GPR105   | 9934   | 3.034 | 2.5 |
| 287_at     | L19871   | activating transcription factor 3                                                                                          | ATF3     | 467    | 3.199 | 2.5 |
| 41700_at   | M62424   | coagulation factor II (thrombin) receptor                                                                                  | F2R      | 2149   | 3.502 | 2.5 |
| 38416_at   | X97978   | cyclin D1 (PRAD1; parathyroid adenomatosis 1)                                                                              | CND1     | 595    | 4.118 | 2.5 |
| 32240_at   | M65292   | H factor (complement)-like 1                                                                                               | HFL1     | 3078   | 3.901 | 2.5 |
| 40720_at   | AL022398 | TRAF3-interacting Jun N-terminal kinase (JNK)-activating modulator                                                         | TJAM     | 80342  | 5.109 | 2.5 |
| 1733_at    | M60315   | bone morphogenetic protein 6                                                                                               | BMP6     | 654    | 3.289 | 2.4 |
| 37403_at   | X05908   | annexin A1                                                                                                                 | ANXA1    | 301    | 3.711 | 2.4 |
| 40698_at   | X96719   | C-type (calcium dependent, carbohydrate-recognition domain) lectin, superfamily member 2 (activation-induced)              | CLEC5F2  | 9976   | 5.096 | 2.4 |
| 37024_at   | AF010312 | lipopolysaccharide-induced TNF factor                                                                                      | LITAF    | 9516   | 5.428 | 2.4 |
| 2002_s_at  | U27467   | BCL2-related protein A1                                                                                                    | BCL2A1   | 597    | 3.976 | 2.4 |
| 2020_at    | M73554   | cyclin D1 (PRAD1; parathyroid adenomatosis 1)                                                                              | CCND1    | 595    | 3.972 | 2.4 |
| 38740_at   | X79067   | zinc finger protein 36, C3H type-like 1                                                                                    | ZFP36L1  | 677    | 6.885 | 2.4 |
| 34857_at   | Z24724   | ATPase family homolog up-regulated in senescence cells                                                                     | AFURS1   | 79572  | 4.789 | 2.4 |
| 34715_at   | U74612   | forkhead box M1                                                                                                            | FOXM1    | 2305   | 5.540 | 2.4 |
| 41723_s_at | M32578   | major histocompatibility complex, class II, DR beta 1                                                                      | HLA-DRB1 | 3123   | 5.154 | 2.4 |
| 40856_at   | U29953   | serine (or cysteine) proteinase inhibitor, clade F (alpha-2 antipainin, pigment epithelium derived factor), member 1       | SERPINF1 | 5176   | 6.873 | 2.4 |
| 33213_g_at | AF006751 | ribosome binding protein 1 homolog 180kDa (dog)                                                                            | RRBP1    | 6238   | 6.638 | 2.4 |
| 1909_at    | M14745   | B-cell CLL/lymphoma 2                                                                                                      | BCL2     | 596    | 4.220 | 2.4 |
| 35474_s_at | Y15915   | chimaeric transcript of collagen type 1 alpha 1 and platelet derived growth factor beta                                    | ---      | ---    | 6.356 | 2.4 |
| 531_at     | U18907   | GLI pathogenesis-related 1 (glioma)                                                                                        | GLIPR1   | 11010  | 4.336 | 2.4 |
| 33690_at   | M18667   | prolactinase (pepsinogen C)                                                                                                | PGC      | 5225   | 2.018 | 2.4 |
| 36659_at   | X05610   | collagen, type IV, alpha 2                                                                                                 | COL4A2   | 1284   | 4.237 | 2.4 |
| 36341_s_at | X64877   | H factor (complement)-like 1                                                                                               | HFL1     | 3078   | 3.901 | 2.4 |
| 35699_at   | AF046918 | BUB1 budding uninhibited by benzimidazoles 1 homolog beta (yeast)                                                          | BUB1B    | 701    | 4.314 | 2.4 |
| 38796_at   | X03084   | complement component 1, q subcomponent, beta polypeptide                                                                   | C1QB     | 713    | 5.113 | 2.4 |
| 37310_at   | X02419   | plasminogen activator, urokinase                                                                                           | PLAU     | 5328   | 4.103 | 2.4 |
| 1237_at    | S81914   | immediate early response 3                                                                                                 | IER3     | 8870   | 4.748 | 2.4 |
| 35357_at   | W26640   | PP784 protein                                                                                                              | PP784    | 114932 | 3.186 | 2.4 |
| 1368_at    | M27492   | interleukin 1 receptor, type I                                                                                             | IL1R1    | 3554   | 5.651 | 2.4 |
| 160025_at  | X70340   | transforming growth factor, alpha                                                                                          | TGFA     | 7039   | 3.848 | 2.4 |
| 40078_at   | AF015287 | protease, serine, 23                                                                                                       | SPUVE    | 11098  | 4.697 | 2.4 |
| 40074_at   | X16396   | methylene tetrahydrofolate dehydrogenase (NAD+ dependent), methenyltetrahydrofolate cyclohydrolase                         | MTHFD2   | 10797  | 5.942 | 2.4 |
| 37544_at   | X64318   | nuclear factor, interleukin 3 regulated                                                                                    | NFIL3    | 4783   | 4.622 | 2.4 |
| 32749_s_at | AL050396 | filamin A, alpha (actin binding protein 280)                                                                               | FLNA     | 2316   | 6.125 | 2.4 |
| 33255_at   | M97856   | nuclear autoantigenic sperm protein (histone-binding)                                                                      | NASP     | 4678   | 5.915 | 2.4 |
| 31496_g_at | X39798   | chemokine (C motif) ligand 1                                                                                               | XCL1     | 6375   | 3.903 | 2.3 |
| 1592_at    | J04088   | topoisomerase (DNA) II, alpha 170kDa                                                                                       | TOP2A    | 7153   | 5.214 | 2.3 |
| 34389_at   | Y11710   | collagen, type XIV, alpha 1 (undulin)                                                                                      | COL14A1  | 7373   | 3.939 | 2.3 |
| 32332_at   | X69433   | isocitrate dehydrogenase 2 (NADP+), mitochondrial                                                                          | IDH2     | 3418   | 6.328 | 2.3 |
| 33051_at   | M62400   | gamma-aminobutyric acid (GABA) receptor, rho 1                                                                             | GABRR1   | 2569   | 1.925 | 2.3 |
| 37918_at   | M15395   | integrin, beta 2 (antigen CD18 (p95), lymphocyte function-associated antigen 1; macrophage antigen 1 (mac-1) beta subunit) | ITGB2    | 3689   | 6.923 | 2.3 |
| 41140_at   | U05875   | interferon gamma receptor 2 (interferon gamma transducer 1)                                                                | IFNGR2   | 3460   | 4.362 | 2.3 |
| 36909_at   | X62048   | WEE1 homolog (S. pombe)                                                                                                    | WEE1     | 7465   | 4.147 | 2.3 |
| 36849_at   | U90920   | PTPL1-associated RhoGAP 1                                                                                                  | PARG1    | 9411   | 3.623 | 2.3 |
| 1348_s_at  | S79219   | propionyl Coenzyme A carboxylase, alpha polypeptide                                                                        | PCCA     | 5095   | 1.640 | 2.3 |
| 947_at     | D55716   | MCM7 minichromosome maintenance deficient 7 (S. cerevisiae)                                                                | MCM7     | 4176   | 6.440 | 2.3 |
| 36908_at   | M93221   | mannose receptor, C type 1                                                                                                 | MRC1     | 4360   | 3.410 | 2.3 |
| 37225_at   | D79994   | ankyrin repeat domain 15                                                                                                   | ANKRD15  | 23189  | 6.628 | 2.3 |
| 41215_s_at | L13891   | inhibitor of DNA binding 2, dominant negative helix-loop-helix protein                                                     | ID2      | 3398   | 6.078 | 2.3 |
| 31631_f_at | AF095288 | pituitary tumor-transforming 1                                                                                             | PTTG1    | 9232   | 6.194 | 2.3 |
| 1365_at    | M26062   | interleukin 2 receptor, beta                                                                                               | IL2RB    | 3560   | 5.278 | 2.3 |
| 1057_at    | M97815   | cellular retinoic acid binding protein 2                                                                                   | CRABP2   | 1382   | 3.779 | 2.3 |
| 41585_at   | AB019289 | KIAA0746 protein                                                                                                           | KIAA0746 | 23231  | 7.476 | 2.3 |
| 31884_at   | M62896   | annexin A2 pseudogene 1                                                                                                    | ANXA2P1  | 303    | 5.330 | 2.3 |
| 2017_s_at  | M64349   | cyclin D1 (PRAD1; parathyroid adenomatosis 1)                                                                              | CCND1    | 595    | 4.462 | 2.3 |
| 32263_at   | AL080146 | cyclin B2                                                                                                                  | CCNB2    | 9133   | 5.192 | 2.3 |
| 33238_at   | U23852   | lymphocyte-specific protein tyrosine kinase                                                                                | LCK      | 3932   | 5.587 | 2.3 |
| 1715_at    | U37518   | tumor necrosis factor (ligand) superfamily, member 10                                                                      | TNFSF10  | 8743   | 5.174 | 2.3 |
| 33026_at   | W28250   | Transcribed sequences                                                                                                      | ---      | ---    | 4.637 | 2.3 |
| 31512_at   | Z00010   | immunoglobulin kappa constant                                                                                              | IGKC     | 3514   | 2.385 | 2.3 |
| 37305_at   | U61145   | enhancer of zeste homolog 2 (Drosophila)                                                                                   | EZH2     | 2146   | 5.425 | 2.3 |
| 41216_r_at | D13891   | inhibitor of DNA binding 2, dominant negative helix-loop-helix protein                                                     | ID2      | 3398   | 5.440 | 2.3 |
| 37039_at   | J00194   | major histocompatibility complex, class II, DR alpha                                                                       | HLA-DRA  | 3122   | 7.267 | 2.3 |
| 39409_at   | M14058   | complement component 1, r subcomponent                                                                                     | C1R      | 715    | 5.531 | 2.3 |
| 39951_at   | L20826   | plastin 1 (I isoform)                                                                                                      | PLS1     | 5357   | 4.511 | 2.3 |
| 33371_s_at | U59877   | RAB31, member RAS oncogene family                                                                                          | RAB31    | 11031  | 5.975 | 2.3 |
| 38992_at   | X64229   | DEK oncogene (DNA binding)                                                                                                 | DEK      | 7913   | 6.563 | 2.3 |
| 38772_at   | Y11307   | cysteine-rich, angiogenic inducer, 61                                                                                      | CYR61    | 3491   | 3.081 | 2.3 |
| 37280_at   | U59912   | SMAD, mothers against DPP homolog 1 (Drosophila)                                                                           | SMAD1    | 4086   | 4.812 | 2.2 |
| 33121_g_at | AF045229 | regulator of G-protein signaling 10                                                                                        | RGS10    | 6001   | 4.095 | 2.2 |
| 31355_at   | U77629   | achaete-scute complex-like 2 (Drosophila)                                                                                  | ASCL2    | 430    | 4.038 | 2.2 |
| 417_at     | X65293   | protein kinase C, epsilon                                                                                                  | PRCKE    | 5581   | 5.397 | 2.2 |
| 35012_at   | M81750   | myeloid cell nuclear differentiation antigen                                                                               | MNDA     | 4332   | 3.792 | 2.2 |
| 34514_at   | S49816   | thyroid stimulating hormone receptor                                                                                       | TSHR     | 7253   | 2.305 | 2.2 |
| 40803_at   | AL050161 | pro-oncosis receptor inducing membrane injury gene                                                                         | PORIMIN  | 114908 | 5.362 | 2.2 |

|            |          |                                                                                                                |             |        |       |     |
|------------|----------|----------------------------------------------------------------------------------------------------------------|-------------|--------|-------|-----|
| 892_at     | M90657   | transmembrane 4 superfamily member 1                                                                           | TM4SF1      | 4071   | 5.071 | 2.2 |
| 39113_at   | AI262789 | protein disulfide isomerase related protein (calcium-binding protein, intestinal-related)                      | ERP70       | 9601   | 5.849 | 2.2 |
| 35995_at   | AF067656 | ZW10 interactor                                                                                                | ZWINT       | 11130  | 6.833 | 2.2 |
| 34795_at   | U84573   | procollagen-lysine, 2-oxoglutarate 5-dioxygenase (lysine hydroxylase) 2                                        | PLOD2       | 5352   | 5.379 | 2.2 |
| 37831_at   | AB011117 | signal-induced proliferation-associated 1 like 3                                                               | SIPA1L3     | 23094  | 6.898 | 2.2 |
| 36736_f_at | Y10275   | L-3-phosphoserine phosphatase                                                                                  | ---         | ---    | 2.300 | 2.2 |
| 33322_i_at | X57348   | stratifin                                                                                                      | SFN         | 2810   | 7.732 | 2.2 |
| 37209_g_at | AJ001612 | phosphoserine phosphatase                                                                                      | PSPH        | 5723   | 2.310 | 2.2 |
| 37762_at   | Y07939   | epithelial membrane protein 1                                                                                  | EMP1        | 2012   | 3.156 | 2.2 |
| 41536_at   | AL022726 | inhibitor of DNA binding 4, dominant negative helix-loop-helix protein                                         | ID4         | 3400   | 3.479 | 2.2 |
| 2089_s_at  | H06628   | v-erb-b2 erythroblastic leukemia viral oncogene homolog 3 (avian)                                              | ERBB3       | 2065   | 4.035 | 2.2 |
| 33127_at   | U89942   | lysyl oxidase-like 2                                                                                           | LOXL2       | 4017   | 5.246 | 2.2 |
| 36007_at   | AL050137 | olfactomedin-like 2B                                                                                           | OLFM2B      | 25903  | 5.233 | 2.2 |
| 39154_at   | AI952982 | growth arrest and DNA-damage-inducible, gamma                                                                  | GADD45G     | 10912  | 3.538 | 2.2 |
| 37203_at   | L07765   | carboxylesterase 1 (monocyte/macrophage serine esterase 1)                                                     | CES1        | 1066   | 1.968 | 2.2 |
| 34407_at   | U77594   | retinoic acid receptor responder (tazarotene induced) 2                                                        | RARRES2     | 5919   | 3.309 | 2.2 |
| 40161_at   | L32137   | cartilage oligomeric matrix protein                                                                            | COMP        | 1311   | 3.532 | 2.2 |
| 1190_at    | Z48541   | protein tyrosine phosphatase, receptor type, O                                                                 | PTPRO       | 5800   | 2.000 | 2.2 |
| 36550_at   | AL049538 | Ras and Rab interactor 2                                                                                       | RIN2        | 54453  | 6.409 | 2.2 |
| 1951_at    | AF004327 | angiotensin II                                                                                                 | ANGPT2      | 285    | 3.613 | 2.2 |
| 1721_g_at  | U65410   | MAD2 mitotic arrest deficient-like 1 (yeast)                                                                   | MAD2L1      | 4085   | 3.221 | 2.2 |
| 38545_at   | M31682   | inhibin, beta B (activin AB beta polypeptide)                                                                  | INHBB       | 3625   | 3.398 | 2.2 |
| 38096_f_at | M63664   | major histocompatibility complex, class II, DP beta 1                                                          | HLA-DPB1    | 3115   | 4.618 | 2.2 |
| 671_at     | J03040   | secreted protein, acidic, cysteine-rich (osteonectin)                                                          | SPARC       | 6678   | 5.184 | 2.2 |
| 41186_at   | W28186   | lysosomal associated protein transmembrane 4 beta                                                              | LAPTM4B     | 55353  | 7.184 | 2.2 |
| 875_g_at   | M26883   | chemokine (C-C motif) ligand 2                                                                                 | CCL2        | 6347   | 4.044 | 2.2 |
| 35016_at   | M13560   | CD74 antigen (invariant polypeptide of major histocompatibility complex, class II antigen-associated)          | CD74        | 972    | 6.555 | 2.2 |
| 34793_s_at | M22299   | plastin 3 (T isoform)                                                                                          | PLS3        | 5358   | 4.167 | 2.2 |
| 38589_i_at | M26708   | prothymosin, alpha (gene sequence 28)                                                                          | PTMA        | 5757   | 9.961 | 2.2 |
| 273_g_at   | K02054   | gastrin-releasing peptide                                                                                      | GRP         | 2922   | 2.033 | 2.2 |
| 39738_at   | Z82215   | myosin, heavy polypeptide 9, non-muscle                                                                        | MYH9        | 4627   | 6.225 | 2.2 |
| 37874_at   | Z47553   | flavin containing monooxygenase 5                                                                              | FMO5        | 2330   | 3.381 | 2.2 |
| 33400_r_at | AL080066 | chromosome 14 open reading frame 147                                                                           | C14orf147   | 171546 | 2.617 | 2.1 |
| 33447_at   | X54304   | myosin regulatory light chain MRCL3                                                                            | MRCL3       | 10627  | 6.579 | 2.1 |
| 31481_s_at | M92383   | thymosin, beta 10                                                                                              | TMSB10      | 9168   | 6.979 | 2.1 |
| 38126_at   | J04599   | biglycan                                                                                                       | BGN         | 633    | 5.436 | 2.1 |
| 40441_g_at | AL080119 | PAI-1 mRNA-binding protein                                                                                     | PAI-RBP1    | 26135  | 5.398 | 2.1 |
| 40742_at   | M16591   | hemopoietic cell kinase                                                                                        | HCK         | 3055   | 5.038 | 2.1 |
| 39457_r_at | AL050355 | sorting nexin 4                                                                                                | SNX4        | 8723   | 6.072 | 2.1 |
| 38428_at   | M13509   | matrix metalloproteinase 1 (interstitial collagenase)                                                          | MMP1        | 4312   | 2.626 | 2.1 |
| 35178_at   | W27944   | WNT inhibitory factor 1                                                                                        | WIF1        | 11197  | 1.969 | 2.1 |
| 3631_f_at  | U40370   | phosphodiesterase 1A, calmodulin-dependent                                                                     | PDE1A       | 5136   | 3.294 | 2.1 |
| 33613_at   | AA806239 | hypothetical protein MGC27165                                                                                  | MGC27165    | 283650 | 6.664 | 2.1 |
| 1347_at    | S78187   | cell division cycle 25B                                                                                        | CDC25B      | 994    | 6.173 | 2.1 |
| 32216_r_at | AB020685 | Rho-related BTB domain containing 3                                                                            | RHOBTB3     | 22836  | 3.430 | 2.1 |
| 40422_at   | L16302   | insulin-like growth factor binding protein 2, 36kDa                                                            | IGFBP2      | 3485   | 3.735 | 2.1 |
| 34766_r_at | AL050209 | solute carrier family 25 (mitochondrial carrier; phosphate carrier), member 24                                 | SLC25A24    | 29957  | 3.753 | 2.1 |
| 41027_at   | AF078096 | forkhead box C1                                                                                                | FOXC1       | 2296   | 3.355 | 2.1 |
| 33399_at   | AA142942 | chromosome 14 open reading frame 147                                                                           | C14orf147   | 171546 | 2.866 | 2.1 |
| 34898_at   | M30704   | amphiregulin (schwannoma-derived growth factor)                                                                | AREG        | 374    | 2.374 | 2.1 |
| 32098_at   | M20777   | collagen, type VI, alpha 2                                                                                     | COL6A2      | 1292   | 4.234 | 2.1 |
| 37985_at   | L37747   | lamin B1                                                                                                       | LMNB1       | 4001   | 4.891 | 2.1 |
| 32068_at   | U62027   | complement component 3a receptor 1                                                                             | C3AR1       | 719    | 6.682 | 2.1 |
| 32148_at   | AI701049 | FERM, RhoGEF (ARHGEF) and pleckstrin domain protein 1 (chondrocyte-derived)                                    | FARP1       | 10160  | 4.529 | 2.1 |
| 33483_at   | X76029   | neuromedin U                                                                                                   | NMU         | 10874  | 4.382 | 2.1 |
| 38847_at   | D79997   | maternal embryonic leucine zipper kinase                                                                       | MELK        | 9833   | 6.086 | 2.1 |
| 36140_at   | J03827   | nuclease sensitive element binding protein 1                                                                   | NSE1        | 4904   | 7.848 | 2.1 |
| 32428_at   | AF026564 | RNA binding motif protein, Y-linked, family 2, member B pseudogene                                             | RBM12BP     | 375850 | 4.992 | 2.1 |
| 33919_at   | AF029113 | transmembrane 4 superfamily member 7                                                                           | TM4SF7      | 7106   | 2.773 | 2.1 |
| 31692_at   | M59830   | heat shock 70kDa protein 1A                                                                                    | HSPA1A      | 3303   | 3.486 | 2.1 |
| 595_at     | M59465   | tumor necrosis factor, alpha-induced protein 3                                                                 | TNFAIP3     | 7128   | 5.005 | 2.1 |
| 34802_at   | X15882   | collagen, type VI, alpha 2                                                                                     | COL6A2      | 1292   | 4.812 | 2.1 |
| 37756_at   | S59184   | RYK receptor-like tyrosine kinase                                                                              | RYK         | 6259   | 6.073 | 2.1 |
| 129_g_at   | X82153   | cathepsin K (pycnodysostosis)                                                                                  | CTSK        | 1513   | 3.818 | 2.1 |
| 33218_at   | M11730   | v-erb-b2 erythroblastic leukemia viral oncogene homolog 2, neuro/glioblastoma derived oncogene homolog (avian) | ERBB2       | 2064   | 5.651 | 2.1 |
| 38593_r_at | KIAA0284 | KIAA0284                                                                                                       | KIAA0284    | 283638 | 3.681 | 2.1 |
| 33894_at   | AJ010046 | neuroepithelial cell transforming gene 1                                                                       | NET1        | 10276  | 4.632 | 2.1 |
| 38750_at   | U97669   | Notch homolog 3 (Drosophila)                                                                                   | NOTCH3      | 4854   | 3.765 | 2.0 |
| 34681_at   | AB002329 | sema domain, immunoglobulin domain (Ig), short basic domain, secreted, (semaphorin) 3E                         | SEMA3E      | 9723   | 3.284 | 2.0 |
| 32683_at   | U18271   | thymopoietin                                                                                                   | TMPO        | 7112   | 2.660 | 2.0 |
| 37558_at   | U97188   | IGF-II mRNA-binding protein 3                                                                                  | IMP-3       | 10643  | 4.877 | 2.0 |
| 32793_at   | X00437   | Human T-cell receptor active beta-chain J/C-segment mRNA from thymus cells, clone pT-beta-2.                   | ---         | ---    | 4.605 | 2.0 |
| 238_at     | M60724   | ribosomal protein S6 kinase, 70kDa, polypeptide 1                                                              | RPS6KB1     | 6198   | 1.905 | 2.0 |
| 34937_at   | AF064019 | DNA fragmentation factor, 40kDa, beta polypeptide (caspase-activated DNase)                                    | DFFB        | 1677   | 1.766 | 2.0 |
| 663_s_at   | L22524   | matrix metalloproteinase 7 (matrilysin, uterine)                                                               | MMP7        | 4316   | 1.830 | 2.0 |
| 1899_at    | U43746   | breast cancer 2, early onset                                                                                   | BRCA2       | 675    | 1.930 | 2.0 |
| 189_s_at   | U09937   | plasminogen activator, urokinase receptor                                                                      | PLAUR       | 5329   | 5.337 | 2.0 |
| 38326_at   | M69199   | putative lymphocyte G0/G1 switch gene                                                                          | G0S2        | 50486  | 2.199 | 2.0 |
| 37424_at   | AB029343 | chromosome 6 open reading frame 18                                                                             | C6orf18     | 54535  | 5.118 | 2.0 |
| 39350_at   | U50410   | glypican 3                                                                                                     | GPC3        | 2719   | 2.418 | 2.0 |
| 39338_at   | AI201310 | S100 calcium binding protein A10 (annexin II ligand, calpactin I, light polypeptide (p11))                     | S100A10     | 6281   | 4.308 | 2.0 |
| 31420_at   | AL008721 | immunoglobulin lambda variable (IV)OR22-1                                                                      | IGLV1OR22-1 | 84088  | 3.279 | 2.0 |
| 40936_at   | AI651806 | cysteine-rich motor neuron 1                                                                                   | CRIM1       | 51232  | 3.931 | 2.0 |
| 38737_at   | M14156   | insulin-like growth factor 1 (somatomedin C)                                                                   | IGF1        | 3479   | 3.701 | 2.0 |
| 37345_at   | AF013759 | calumenin                                                                                                      | CALU        | 813    | 4.562 | 2.0 |
| 37302_at   | U30872   | centromere protein F, 350/400kDa (mitosin)                                                                     | CENPF       | 1063   | 4.842 | 2.0 |
| 36890_at   | AF001691 | periplakin                                                                                                     | PPL         | 5493   | 3.486 | 2.0 |
| 41745_at   | X57352   | interferon induced transmembrane protein 3 (1-8U)                                                              | IFITM3      | 10410  | 6.157 | 2.0 |
| 1602_at    | L33881   | protein kinase C, iota                                                                                         | PRKCI       | 5584   | 6.157 | 2.0 |
| 1990_g_at  | U43746   | breast cancer 2, early onset                                                                                   | BRCA2       | 675    | 4.057 | 2.0 |
| 38453_at   | X15606   | intercellular adhesion molecule 2                                                                              | ICAM2       | 3384   | 4.483 | 2.0 |
| 31751_f_at | Z98744   | histone 1, H4I                                                                                                 | HIST1H4L    | 8368   | 4.615 | 2.0 |
